# Supplementary material
Source: PubMed Central journal article supplement (PMC5810241)

## **Cu–Catalyzed Transannulation Reaction of Pyridotriazoles with Terminal Alkynes under Aerobic Conditions: Efficient Synthesis of Indolizines**

V. Helan, A. V. Gulevich, and V. Gevorgyan\*

*Department of Chemistry, University of Illinois at Chicago, 845 West Taylor Street, Chicago, Illinois 60607*

### **Table of contents**

|                                                                                          |     |
|------------------------------------------------------------------------------------------|-----|
| General information                                                                      | S2  |
| 1. Synthesis of Pyridotriazoles ( <b>1</b> )                                             | S2  |
| 2. Optimization of the Cu-catalyzed Transannulation Reaction Conditions                  | S3  |
| 3. General Procedure for the Synthesis of Indolizines ( <b>3</b> )                       | S4  |
| 4. Mechanistic Studies of the Cu-catalyzed Transannulation Reaction                      | S10 |
| 5. Copies of <sup>1</sup> H and <sup>13</sup> C NMR Spectra for Indolizines ( <b>3</b> ) | S12 |
| 6. Copies of <sup>1</sup> H NMR Spectra for deuterium-labeling studies                   | S36 |

## General information

GC/MS analysis was performed on a Hewlett Packard Model 6890 GC interfaced to a Hewlett Packard Model 5973 mass selective detector (15 m x 0.25 mm capillary column, HP-5MS). Column chromatography was carried out employing Silicycle Silica-P flash silica gel (40-63  $\mu\text{m}$ ). Precoated silica gel plates F-254 were used for thin-layer analytical chromatography. NMR spectra were recorded on Bruker Avance DRX-500 (500 MHz) or DPX-400 (400 MHz) instrument. All manipulations with transition metal catalysts were conducted in oven-dried glassware under inert atmosphere using a glovebox unless otherwise noted. Anhydrous solvents purchased from Sigma-Aldrich were additionally purified on PureSolv PS-400-4 by Innovative Technology, Inc. purification system and/or stored over calcium hydride. The starting materials were purchased from Sigma-Aldrich and Alfa Aesar.

### 1. Synthesis of Pyridotriazoles (1)

[1,2,3]triazolo[1,5-*a*]pyridines **1a**,**b**<sup>1</sup> and **1c**,**d**<sup>2</sup> were synthesized according to the literature procedures.

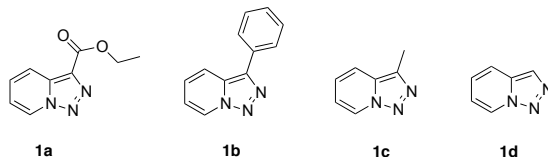

<sup>1</sup> Chuprakov, S.; Hwang, F. W.; Gevorgyan, V. *Angew. Chem., Int. Ed.* **2007**, *46*, 4757.

<sup>2</sup> Hirayama, T.; Ueda, S.; Okada, T.; Tsurue, N.; Okuda, K.; Nagasawa, H. et al *Chem Eur. J.* **2014**, *20*, 4156.

## 2. Optimization of the Cu-catalyzed Transannulation Reaction Conditions<sup>a</sup>

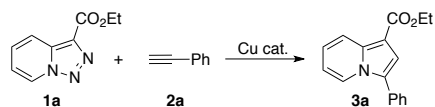

An oven dried 1 mL Wheaton V-vial capped with a mininert syringe valve, containing a stirring bar, was charged with a pyridotriazole **1a** (0.1 mmol, 1 equiv), catalyst (0.015 mmol, 15 mol %), dry toluene (0.1 mL, 1M), and phenylacetylene (3 or 1.2 equiv) under Ar or air atmosphere. The reaction mixture was stirred at the indicated temperature for about 4 hours and analyzed by GC-MS using pentadecane as internal standard.

| <i>Entry</i>    | <i>Catalyst</i>                        |          | <i>Solvent</i> | <i>T (°C)</i> | <i>Yield<sup>b</sup></i> |
|-----------------|----------------------------------------|----------|----------------|---------------|--------------------------|
| 1               | No catalyst                            | -        | Toluene        | 100 °C        | N.R.                     |
| 2               | Rh <sub>2</sub> (hfb) <sub>4</sub>     | 15 mol % | Toluene        | 100 °C        | N.R. <sup>c</sup>        |
| 3               | CuBr                                   | 15 mol % | Toluene        | 100 °C        | N.R.                     |
| 4               | CuBr <sub>2</sub>                      | 15 mol % | Toluene        | 100 °C        | N.R.                     |
| 5               | CuCl                                   | 15 mol % | Toluene        | 100 °C        | N.R.                     |
| 6               | CuCl <sub>2</sub>                      | 15 mol % | Toluene        | 100 °C        | N.R.                     |
| 7               | CuI                                    | 15 mol % | Toluene        | 100 °C        | N.R.                     |
| 8               | Cu(OAc) <sub>2</sub>                   | 15 mol % | Toluene        | 100 °C        | N.R.                     |
| 9               | CuOTf•0.5C <sub>6</sub> H <sub>6</sub> | 15 mol % | Toluene        | 100 °C        | 38%                      |
| 10              | Cu(OTf) <sub>2</sub>                   | 15 mol % | Toluene        | 100 °C        | 25%                      |
| 11              | Cu(MeCN) <sub>4</sub> PF <sub>6</sub>  | 15 mol % | Toluene        | 100 °C        | 50%                      |
| 12 <sup>d</sup> | Cu(MeCN) <sub>4</sub> PF <sub>6</sub>  | 15 mol % | Toluene        | 120 °C        | 96%                      |
| 13 <sup>d</sup> | Cu(MeCN) <sub>4</sub> PF <sub>6</sub>  | 15 mol % | DCE            | 120 °C        | 89%                      |
| 14 <sup>d</sup> | Cu(MeCN) <sub>4</sub> PF <sub>6</sub>  | 15 mol % | DMA            | 120 °C        | 28%                      |
| 15 <sup>d</sup> | Cu(MeCN) <sub>4</sub> PF <sub>6</sub>  | 15 mol % | Toluene        | 130 °C        | 99%                      |
| 16 <sup>d</sup> | Cu(MeCN) <sub>4</sub> PF <sub>6</sub>  | 10 mol % | Toluene        | 130 °C        | 91%                      |
| 17 <sup>d</sup> | Cu(MeCN) <sub>4</sub> PF <sub>6</sub>  | 5 mol %  | Toluene        | 130 °C        | 49%                      |
| 18 <sup>e</sup> | Cu(MeCN) <sub>4</sub> PF <sub>6</sub>  | 15 mol % | Toluene        | 130 °C        | 99%                      |

<sup>a</sup>Triazole (1 equiv), Alkyne (3 equiv), Catalyst (15 mol %), solvent (1M). <sup>b</sup>GCMS yields are given. <sup>c</sup>Polymerization of the alkyne was observed. <sup>d</sup>1.2 equiv of alkyne was used. <sup>e</sup>In air with 1.2 equiv of alkyne. hfb = heptafluorobutyrate.

### 3. General procedure for the synthesis of indolizines (3)

An oven dried 3 mL Wheaton V-vial capped with a mininert syringe valve, containing a stirring bar, was charged with a pyridotriazole (0.5 mmol, 1 equiv), Cu(MeCN)<sub>4</sub>PF<sub>6</sub> (28 mg, 0.075 mmol, 15 mol %), dry toluene (0.5 mL, 1M), and a terminal alkyne (0.6 mmol, 1.2 equiv) in air. The reaction mixture was stirred at 130 °C for 1 to 12h. The residue was then directly purified by column chromatography on triethylamine-treated silica gel (EtOAc/Hexane) to afford the corresponding indolizine **3**.

#### *Ethyl 3-phenylindolizine-1-carboxylate (3a)*

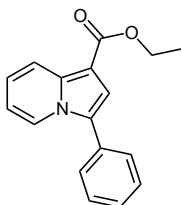

Reaction time: 4h; 70% yield (0.35 mmol, 93 mg), eluent: EtOAc/Hex = 1/19. <sup>1</sup>H NMR (500 MHz, CDCl<sub>3</sub>): δ ppm 8.29-8.27 (m, 2H), 7.54 (d, *J* = 7.1 Hz, 2H), 7.49 (t, *J* = 7.7 Hz, 2H), 7.39 (t, *J* = 7.3 Hz, 1H), 7.32 (s, 1H), 7.06 (t, *J* = 8.0 Hz, 1H), 6.69 (t, *J* = 6.8 Hz, 1H), 4.40 (q, *J* = 7.1 Hz, 2H), 1.43 (t, *J* = 7.1 Hz, 3H). <sup>13</sup>C NMR (126 MHz, CDCl<sub>3</sub>): δ ppm 165.02, 136.34, 131.26, 129.08, 128.59, 127.99, 126.41, 123.33, 122.22, 120.17, 116.11, 112.58, 104.27, 59.55, 14.70. HRMS (ES<sup>+</sup>) calcd. for C<sub>17</sub>H<sub>15</sub>NO<sub>2</sub> [M]<sup>+</sup>: 266.1181, found: 266.1182.

#### *Ethyl 3-(p-tolyl)indolizine-1-carboxylate (3b)*

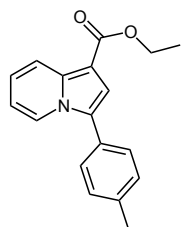

Reaction time: 4h; 74% yield (0.37 mmol, 103 mg), eluent: EtOAc/Hex = 1/19. <sup>1</sup>H NMR (500 MHz, CDCl<sub>3</sub>): δ ppm 8.27-8.25 (m, 2H), 7.43 (d, *J* = 8.0 Hz, 2H), 7.30 (d, *J* = 7.8 Hz, 2H), 7.28 (s, 1H), 7.05 (dd, *J* = 9.4, 6.6 Hz, 1H), 6.68 (t, *J* = 7.2 Hz, 1H), 4.40 (q, *J* = 7.1 Hz, 2H), 2.43 (s, 3H), 1.43 (t, *J* = 7.1 Hz, 3H). <sup>13</sup>C NMR (126 MHz, CDCl<sub>3</sub>): δ ppm 165.06, 137.93, 136.21, 129.76, 128.56, 128.30, 126.49, 123.39, 122.05, 120.14, 115.80, 112.46, 104.12, 59.51, 21.32, 14.70. HRMS (ES<sup>+</sup>) calcd. for C<sub>18</sub>H<sub>17</sub>NO<sub>2</sub> [M]<sup>+</sup>: 280.1338, found: 280.1334.

#### *Ethyl 3-(4-methoxyphenyl)indolizine-1-carboxylate (3c)*

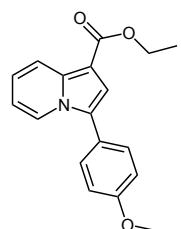

Reaction time: 4h; 65% yield (0.325 mmol, 96 mg) eluent: EtOAc/Hex = 1/6. <sup>1</sup>H NMR (500 MHz, CDCl<sub>3</sub>): δ ppm 8.25 (d, *J* = 9.0 Hz, 1H), 8.20 (d, *J* = 7.1 Hz, 1H), 7.45 (d, *J* = 8.7 Hz, 2H), 7.24 (s, 1H), 7.04 (m, 3H), 6.68 (t, *J* = 6.8 Hz, 1H), 4.39 (q, *J* = 7.1 Hz, 2H), 3.87 (s, 3H), 1.42 (t, *J* = 7.1 Hz, 3H). <sup>13</sup>C NMR (126 MHz, CDCl<sub>3</sub>): δ ppm 165.08, 159.45, 136.02, 130.14, 126.23, 123.56, 123.31, 121.95, 120.09, 115.59, 114.51, 112.42, 103.96, 59.49, 55.39, 14.69. HRMS (ES<sup>+</sup>) calcd. for C<sub>18</sub>H<sub>17</sub>NO<sub>3</sub> [M]<sup>+</sup>: 296.1287, found: 296.1282.

#### *Ethyl 3-(4-fluorophenyl)indolizine-1-carboxylate (3d)*

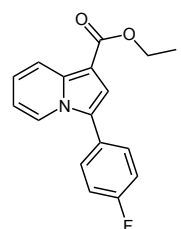

Reaction time: 4h; 70% yield (0.35 mmol, 99 mg), eluent: EtOAc/Hex = 1/19. <sup>1</sup>H NMR (500 MHz, CDCl<sub>3</sub>): δ ppm 8.26 (d, *J* = 9.0 Hz, 1H), 8.18 (d, *J* = 7.1 Hz, 1H), 7.50 (dd, *J* = 8.1, 5.4 Hz, 2H), 7.27 (s, 1H), 7.19 (t, *J* = 8.4 Hz, 2H), 7.07 (dd, *J* = 8.3, 7.3 Hz, 1H), 6.71 (t, *J* = 6.8 Hz, 1H), 4.39 (q, *J* = 7.1 Hz, 2H), 1.42 (t, *J* = 7.1 Hz, 3H). <sup>13</sup>C NMR (126 MHz, CDCl<sub>3</sub>): δ ppm 164.94, 163.40, 161.43, 136.23, 130.58, 130.51, 127.33, 127.30, 125.24, 123.08, 122.23, 120.21, 116.26, 116.13, 116.08, 112.70, 104.24, 59.58, 14.67. HRMS (ES<sup>+</sup>) calcd. for C<sub>17</sub>H<sub>14</sub>FNO<sub>2</sub> [M]<sup>+</sup>: 284.1087, found: 284.1085.

**Ethyl 3-(4-(methoxycarbonyl)phenyl)indolizine-1-carboxylate (3e)**

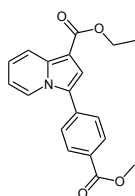

Reaction time: 4h; 48% yield (0.24 mmol, 78 mg), eluent: EtOAc/Hex = 1/19. <sup>1</sup>H NMR (500 MHz, CDCl<sub>3</sub>): δ ppm 8.35 (d, *J* = 7.1 Hz, 1H), 8.28 (d, *J* = 9.0 Hz, 1H), 8.15 (d, *J* = 8.0 Hz, 2H), 7.64 (d, *J* = 8.1 Hz, 2H), 7.39 (s, 1H), 7.10 (dd, *J* = 8.4, 7.2 Hz, 1H), 6.75 (t, *J* = 6.8 Hz, 1H), 4.39 (q, *J* = 7.1 Hz, 2H), 3.95 (s, 3H), 1.42 (t, *J* = 7.1 Hz, 3H). <sup>13</sup>C NMR (126 MHz, CDCl<sub>3</sub>): δ ppm 166.60, 164.77, 136.95, 135.77, 130.39, 129.12, 127.80, 125.26, 123.27, 122.73, 120.36, 117.14, 113.08, 104.93, 59.67, 52.23, 14.64. HRMS (ES<sup>+</sup>) calcd. for C<sub>19</sub>H<sub>17</sub>NO<sub>4</sub> [M]<sup>+</sup>: 324.1236, found: 324.1239.

**Ethyl 3-(*m*-tolyl)indolizine-1-carboxylate (3f)**

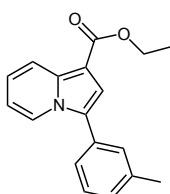

Reaction time: 4h; 57% yield (0.285 mmol, 76 mg), eluent: EtOAc/Hex = 1/19. <sup>1</sup>H NMR (500 MHz, CDCl<sub>3</sub>): δ ppm 8.30 (d, *J* = 7.1 Hz, 1H), 8.27 (d, *J* = 9.1 Hz, 1H), 7.37 (m, 3H), 7.30 (s, 1H), 7.22 (d, *J* = 7.3 Hz, 1H), 7.06 (dd, *J* = 9.0, 6.7 Hz, 1H), 6.70 (t, *J* = 6.8 Hz, 1H), 4.40 (q, *J* = 7.0 Hz, 2H), 2.43 (s, 3H), 1.43 (t, *J* = 7.1 Hz, 3H). <sup>13</sup>C NMR (126 MHz, CDCl<sub>3</sub>): δ ppm 165.05, 138.84, 136.30, 131.18, 129.33, 128.93, 128.78, 126.57, 125.59, 123.46, 122.12, 120.14, 115.99, 112.49, 104.18, 59.52, 21.49, 14.68. HRMS (ES<sup>+</sup>) calcd. for C<sub>18</sub>H<sub>17</sub>NO<sub>2</sub> [M]<sup>+</sup>: 280.1338, found: 280.1337.

**Ethyl 3-(3-chlorophenyl)indolizine-1-carboxylate (3g)**

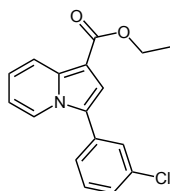

Reaction time: 4h; 60% yield (0.3 mmol, 90 mg), eluent: EtOAc/Hex = 1/19. <sup>1</sup>H NMR (500 MHz, CDCl<sub>3</sub>): δ ppm 8.28 (d, *J* = 8.7 Hz, 2H), 7.55 (t, *J* = 1.2 Hz, 1H), 7.44-7.41 (m, 2H), 7.37 (dt, *J* = 6.4, 2.4 Hz, 1H), 7.33 (s, 1H), 7.10 (dd, *J* = 9.6, 7.0 Hz, 1H), 6.74 (t, *J* = 6.7 Hz, 1H), 4.39 (q, *J* = 7.1 Hz, 2H), 1.42 (t, *J* = 7.1 Hz, 3H). <sup>13</sup>C NMR (126 MHz, CDCl<sub>3</sub>): δ ppm 164.83, 136.58, 134.99, 133.05, 130.34, 128.41, 127.99, 126.52, 124.81, 123.15, 122.52, 120.29, 116.65, 112.93, 104.58, 59.63, 14.66. HRMS (ES<sup>+</sup>) calcd. for C<sub>17</sub>H<sub>14</sub>ClNO<sub>2</sub> [M]<sup>+</sup>: 300.0791, found: 300.0789.

**Ethyl 3-(2-methoxyphenyl)indolizine-1-carboxylate (3h)**

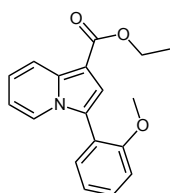

Reaction time: 4h; 94% yield (0.47 mmol, 139 mg), eluent: EtOAc/Hex = 1/6. <sup>1</sup>H NMR (500 MHz, CDCl<sub>3</sub>): δ ppm 8.28 (d, *J* = 9.0 Hz, 1H), 7.69 (d, *J* = 7.1 Hz, 1H), 7.44 (t, *J* = 7.9 Hz, 1H), 7.40 (d, *J* = 7.5 Hz, 1H), 7.31 (s, 1H), 7.08 (m, 2H), 7.03 (d, *J* = 8.3 Hz, 1H), 6.67 (t, *J* = 6.8 Hz, 1H), 4.40 (q, *J* = 7.1 Hz, 2H), 3.77 (s, 3H), 1.42 (t, *J* = 7.1 Hz, 3H). <sup>13</sup>C NMR (126 MHz, CDCl<sub>3</sub>): δ ppm 165.14, 157.43, 136.18, 132.40, 130.17, 125.21, 123.74, 122.03, 121.04, 119.93, 119.67, 116.61, 111.70, 111.09, 103.77, 59.40, 55.44, 14.74. HRMS (ES<sup>+</sup>) calcd. for C<sub>18</sub>H<sub>17</sub>NO<sub>3</sub> [M]<sup>+</sup>: 296.1287, found: 296.1282.

**Ethyl 3-(2-(trifluoromethyl)phenyl)indolizine-1-carboxylate (3i)**

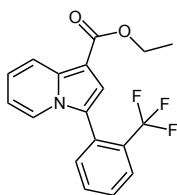

Reaction time: 4h; 78% yield (0.39 mmol, 130 mg), eluent: EtOAc/Hex = 1/9.  $^1\text{H}$  NMR (500 MHz,  $\text{CDCl}_3$ ):  $\delta$  ppm 8.26 (d,  $J$  = 9.1 Hz, 1H), 7.86 (d,  $J$  = 7.8 Hz, 1H), 7.66 (t,  $J$  = 7.4 Hz, 1H), 7.60 (t,  $J$  = 7.7 Hz, 1H), 7.56 (d,  $J$  = 7.0 Hz, 1H), 7.45 (d,  $J$  = 7.5 Hz, 1H), 7.29 (s, 1H), 7.07 (t,  $J$  = 7.9 Hz, 1H), 6.64 (t,  $J$  = 6.8 Hz, 1H), 4.39 (t,  $J$  = 6.5 Hz, 2H), 1.42 (t,  $J$  = 7.1 Hz, 3H).  $^{13}\text{C}$  NMR (126 MHz,  $\text{CDCl}_3$ ):  $\delta$  ppm 165.01, 135.73, 133.58, 132.08, 131.40 (q,  $^2J$  = 30 Hz), 129.61; 129.37, 126.83 (m); 123.71, 123.58 (q,  $^1J$  = 274.9 Hz), 122.23, 121.33, 119.83, 117.61, 112.46, 104.05, 59.57, 14.64. HRMS (ES+) calcd. for  $\text{C}_{18}\text{H}_{14}\text{F}_3\text{NO}_2$   $[\text{M}]^+$ : 334.1055, found: 334.1054.

**Ethyl 3-(2,4,5-trimethylphenyl)indolizine-1-carboxylate (3j)**

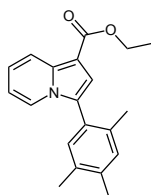

Reaction time: 4h; 75% yield (0.375 mmol, 115 mg), eluent: EtOAc/Hex = 1/19.  $^1\text{H}$  NMR (500 MHz,  $\text{CDCl}_3$ ):  $\delta$  ppm 8.26 (d,  $J$  = 9.1 Hz, 1H), 7.63 (d,  $J$  = 7.0 Hz, 1H), 7.20 (s, 1H), 7.13 (s, 1H), 7.10 (s, 1H), 7.06 (dd,  $J$  = 9.0, 6.6 Hz, 1H), 6.65 (t,  $J$  = 6.8 Hz, 1H), 4.40 (q,  $J$  = 7.1 Hz, 2H), 2.32 (s, 3H), 2.27 (s, 3H), 2.05 (s, 3H), 1.43 (t,  $J$  = 7.1 Hz, 3H).  $^{13}\text{C}$  NMR (126 MHz,  $\text{CDCl}_3$ ):  $\delta$  ppm 165.21, 137.55, 135.56, 135.52, 134.33, 132.49, 131.81, 127.64, 125.76, 123.81, 121.80, 119.90, 116.02, 112.20, 103.52, 59.46, 19.55, 19.18, 19.04, 14.71. HRMS (ES+) calcd. for  $\text{C}_{20}\text{H}_{21}\text{NO}_2$   $[\text{M}]^+$ : 308.1651, found: 308.1642.

**Ethyl 3-(thiophen-3-yl)indolizine-1-carboxylate (3k)**

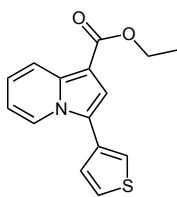

Reaction time: 12h; 33% yield (0.165 mmol, 45 mg), eluent: EtOAc/Hex = 1/19.  $^1\text{H}$  NMR (500 MHz,  $\text{CDCl}_3$ ):  $\delta$  ppm 8.28 (d,  $J$  = 7.1 Hz, 1H), 8.26 (d,  $J$  = 9.5 Hz, 1H), 7.48 (dd,  $J$  = 4.9, 2.9 Hz, 1H), 7.46 (dd,  $J$  = 2.9, 1.3 Hz, 1H), 7.33 (s, 1H), 7.32 (dd,  $J$  = 5.5, 1.9 Hz, 1H), 7.07 (dd,  $J$  = 8.4, 7.1 Hz, 1H), 6.74 (t,  $J$  = 6.8 Hz, 1H), 4.39 (q,  $J$  = 7.1 Hz, 2H), 1.42 (t,  $J$  = 7.1 Hz, 3H).  $^{13}\text{C}$  NMR (126 MHz,  $\text{CDCl}_3$ ):  $\delta$  ppm 164.96, 136.17, 131.55, 127.56, 126.51, 123.67, 122.67, 122.09, 121.74, 120.11, 116.08, 112.71, 104.04, 59.57, 14.67. HRMS (ES+) calcd. for  $\text{C}_{15}\text{H}_{13}\text{NO}_2\text{S}$   $[\text{M}]^+$ : 272.0745, found: 272.0743.

**Ethyl 3-(cyclohex-1-en-1-yl)indolizine-1-carboxylate (3l)**

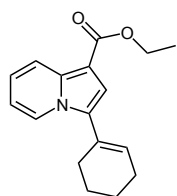

Reaction time: 5h; 67% yield (0.335 mmol, 90 mg), eluent: EtOAc/Hex = 1/9.  $^1\text{H}$  NMR (500 MHz,  $\text{CDCl}_3$ ):  $\delta$  ppm 8.23 (d,  $J$  = 7.1 Hz, 1H), 8.19 (d,  $J$  = 9.0 Hz, 1H), 7.10 (s, 1H), 6.99 (t,  $J$  = 7.8 Hz, 1H), 6.66 (t,  $J$  = 6.8 Hz, 1H), 6.05 (s, 1H), 4.36 (q,  $J$  = 7.1 Hz, 2H), 2.35-2.25 (m, 4H), 1.83-1.70 (m, 4H), 1.40 (t,  $J$  = 7.1 Hz, 3H).  $^{13}\text{C}$  NMR (126 MHz,  $\text{CDCl}_3$ ):  $\delta$  ppm 165.12, 135.98, 128.39, 128.27, 128.09, 124.45, 121.56, 119.99, 114.15, 112.02, 103.33, 59.39, 29.07, 25.51, 22.88, 22.05, 14.67. HRMS (ES+) calcd. for  $\text{C}_{17}\text{H}_{19}\text{NO}_2$   $[\text{M}]^+$ : 270.1494, found: 270.1495.

### **Ethyl 3-benzylindolizine-1-carboxylate (3m)**

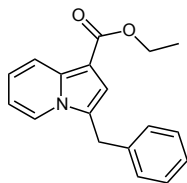

Reaction time: 4h; 68% yield (0.34 mmol, 95 mg), eluent: EtOAc/Hex = 1/19. <sup>1</sup>H NMR (500 MHz, CDCl<sub>3</sub>): δ ppm 8.23 (d, *J* = 9.1 Hz, 1H), 7.72 (d, *J* = 7.0 Hz, 1H), 7.30 (t, *J* = 7.3 Hz, 2H), 7.25 (t, *J* = 7.2 Hz, 1H), 7.18 (d, *J* = 7.2 Hz, 2H), 7.10 (s, 1H), 7.03 (dd, *J* = 8.5, 7.2 Hz, 1H), 6.65 (t, *J* = 6.8 Hz, 1H), 4.38 (q, *J* = 7.1 Hz, 2H), 4.20 (s, 2H), 1.41 (t, *J* = 7.1 Hz, 3H). <sup>13</sup>C NMR (126 MHz, CDCl<sub>3</sub>): δ ppm 165.09, 136.89, 136.08, 128.77, 128.37, 126.80, 123.51, 123.06, 121.52, 119.96, 115.95, 112.27, 103.02, 59.45, 32.39, 14.71. HRMS (ES+) calcd. for C<sub>18</sub>H<sub>17</sub>NO<sub>2</sub> [M]<sup>+</sup>: 280.1338, found: 280.1335.

### **Ethyl 3-butylindolizine-1-carboxylate (3n)**

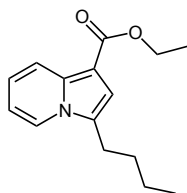

Reaction time: 5h; 82% yield (0.41 mmol, 100 mg), eluent: EtOAc/Hex = 1/19. <sup>1</sup>H NMR (500 MHz, CDCl<sub>3</sub>): δ ppm 8.18 (d, *J* = 9.0 Hz, 1H), 7.82 (d, *J* = 7.0 Hz, 1H), 7.03 (s, 1H), 7.01 (t, *J* = 7.8 Hz, 1H), 6.72 (t, *J* = 6.8 Hz, 1H), 4.35 (q, *J* = 7.1 Hz, 2H), 2.76 (t, *J* = 7.6 Hz, 2H), 1.74 (quintet, *J* = 7.6 Hz, 2H), 1.45 (q, *J* = 7.5 Hz, 2H), 1.40 (t, *J* = 7.1 Hz, 3H), 0.97 (t, *J* = 7.4 Hz, 3H). <sup>13</sup>C NMR (126 MHz, CDCl<sub>3</sub>): δ ppm 165.17, 135.61, 125.68, 122.67, 121.06, 119.98, 113.61, 112.06, 102.79, 59.34, 28.98, 25.39, 22.55, 14.70, 13.89. HRMS (ES+) calcd. for C<sub>15</sub>H<sub>19</sub>NO<sub>2</sub> [M]<sup>+</sup>: 246.1494, found: 246.1493.

### **Ethyl 3-cyclohexylindolizine-1-carboxylate (3o)**

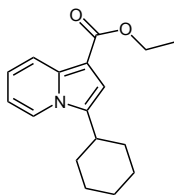

Reaction time: 5h; 83% yield (0.42 mmol, 112 mg), eluent: EtOAc/Hex = 1/19. <sup>1</sup>H NMR (500 MHz, CDCl<sub>3</sub>): δ ppm 8.20 (d, *J* = 9.0 Hz, 1H), 7.89 (d, *J* = 7.1 Hz, 1H), 7.03 (s, 1H), 7.00 (dd, *J* = 8.6, 7.1 Hz, 1H), 6.72 (t, *J* = 6.3 Hz, 1H), 4.36 (q, *J* = 7.1 Hz, 2H), 2.80-2.76 (m, 1H), 2.09 (d, *J* = 8.6 Hz, 2H), 1.89-1.87 (m, 2H), 1.82-1.44 (m, 6H), 1.41 (t, *J* = 7.1 Hz, 3H). <sup>13</sup>C NMR (126 MHz, CDCl<sub>3</sub>): δ ppm 165.21, 135.60, 131.11, 122.79, 121.08, 120.15, 111.98, 111.67, 102.86, 59.35, 34.97, 31.61, 26.45, 26.27, 14.71. HRMS (ES+) calcd. for C<sub>17</sub>H<sub>21</sub>NO<sub>2</sub> [M]<sup>+</sup>: 272.1651, found: 272.1648.

### **Ethyl 3-(3-(benzyloxy)propyl)indolizine-1-carboxylate (3p)**

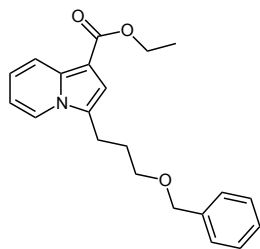

Reaction time: 10h; 53% yield (0.265 mmol, 89 mg), eluent: EtOAc/Hex = 1/6. <sup>1</sup>H NMR (500 MHz, CDCl<sub>3</sub>): δ ppm 8.20 (d, *J* = 9.0 Hz, 1H), 7.89 (d, *J* = 7.0 Hz, 1H), 7.36 (d, *J* = 4.5 Hz, 4H), 7.30 (dd, *J* = 8.8, 4.6 Hz, 1H), 7.04-7.01 (m, 2H), 6.73 (t, *J* = 6.8 Hz, 1H), 4.53 (s, 2H), 4.37 (q, *J* = 7.1 Hz, 2H), 3.58 (t, *J* = 6.0 Hz, 2H), 2.92 (t, *J* = 7.5 Hz, 2H), 2.08 (dt, *J* = 14.1, 6.8 Hz, 2H), 1.41 (t, *J* = 7.1 Hz, 3H). <sup>13</sup>C NMR (126 MHz, CDCl<sub>3</sub>): δ ppm 165.15, 138.37, 135.70, 128.42, 127.67, 127.64, 125.03, 122.80, 121.21, 119.96, 113.81, 112.15, 102.87, 73.05, 69.24, 59.39, 27.39, 22.32, 14.70. HRMS (ES+) calcd. for C<sub>21</sub>H<sub>23</sub>NO<sub>3</sub> [M]<sup>+</sup>: 338.1756, found: 338.1756.

**Ethyl 3-(3-(1,3-dioxisoindolin-2-yl)propyl)indolizine-1-carboxylate (3q)**

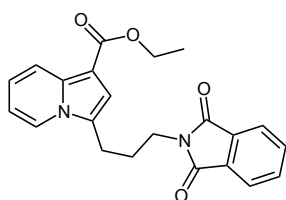

Reaction time: 12h; 82% yield (0.41 mmol, 154 mg), eluent: EtOAc/Hex = 1/9.  $^1\text{H}$  NMR (500 MHz,  $\text{CDCl}_3$ ):  $\delta$  ppm 8.16 (d,  $J$  = 9.0 Hz, 1H), 7.83-7.80 (m, 3H), 7.70 (dd,  $J$  = 5.1, 5.5 Hz, 2H), 7.07 (s, 1H), 7.01 (t,  $J$  = 7.8 Hz, 1H), 6.74 (t,  $J$  = 6.6 Hz, 1H), 4.33 (q,  $J$  = 7.1 Hz, 2H), 3.85 (t,  $J$  = 6.9 Hz, 2H), 2.84 (t,  $J$  = 7.8 Hz, 2H), 2.20 (quintet,  $J$  = 7.4 Hz, 2H), 1.38 (t,  $J$  = 7.1 Hz, 3H).  $^{13}\text{C}$  NMR (126 MHz,  $\text{CDCl}_3$ ):  $\delta$  ppm 168.36, 164.98, 135.77, 133.99, 131.99, 123.91, 123.24, 122.58, 121.30, 119.96, 113.73, 112.30, 102.95, 59.35, 37.68, 25.85, 23.30, 14.67. HRMS (ES+) calcd. for  $\text{C}_{22}\text{H}_{20}\text{N}_2\text{O}_4$  [ $\text{M}$ ] $^+$ : 377.1501, found: 377.1496.

**Ethyl 3-(3-cyanopropyl)indolizine-1-carboxylate (3r)**

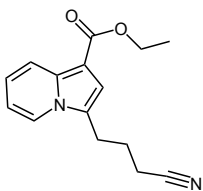

Reaction time: 12h; 66% yield (0.33 mmol, 84 mg), eluent: EtOAc/Hex = 1/4.  $^1\text{H}$  NMR (500 MHz,  $\text{CDCl}_3$ ):  $\delta$  ppm 8.21 (d,  $J$  = 9.1 Hz, 1H), 7.84 (d,  $J$  = 6.3 Hz, 1H), 7.06 (s, 1H), 7.06 (t,  $J$  = 7.8 Hz, 1H), 6.78 (t,  $J$  = 6.8 Hz, 1H), 4.36 (q,  $J$  = 7.1 Hz, 2H), 2.99 (t,  $J$  = 7.4 Hz, 2H), 2.47 (t,  $J$  = 6.9 Hz, 2H), 2.13 (quintet,  $J$  = 7.2 Hz, 2H), 1.40 (t,  $J$  = 7.1 Hz, 3H).  $^{13}\text{C}$  NMR (126 MHz,  $\text{CDCl}_3$ ):  $\delta$  ppm 164.90, 135.95, 122.42, 121.61, 120.17, 119.12, 114.24, 112.63, 103.21, 59.52, 24.41, 22.85, 16.76, 14.67. HRMS (ES+) calcd. for  $\text{C}_{15}\text{H}_{16}\text{N}_2\text{O}_2$  [ $\text{M}$ ] $^+$ : 257.1290, found: 257.1290.

**1,3-diphenylindolizine (3s)**

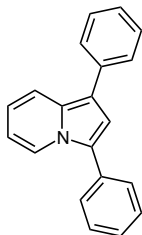

Reaction time: 4h; 77% yield (0.358 mmol, 104 mg), eluent: EtOAc/Hex = 1/19.  $^1\text{H}$  NMR (500 MHz,  $\text{CDCl}_3$ ):  $\delta$  ppm 8.31 (d,  $J$  = 7.2 Hz, 1H), 7.81 (d,  $J$  = 9.1 Hz, 1H), 7.67 (d,  $J$  = 8.2 Hz, 2H), 7.64 (d,  $J$  = 8.2 Hz, 2H), 7.52 (t,  $J$  = 7.8 Hz, 2H), 7.48 (t,  $J$  = 7.5 Hz, 2H), 7.39 (t,  $J$  = 7.4 Hz, 1H), 7.29 (t,  $J$  = 6.9 Hz, 1H), 7.08 (s, 1H), 6.78 (dd,  $J$  = 9.1, 6.4 Hz, 1H), 6.54 (t,  $J$  = 7.3 Hz, 1H).  $^{13}\text{C}$  NMR (126 MHz,  $\text{CDCl}_3$ ):  $\delta$  ppm 136.29, 132.21, 130.21, 129.04, 128.80, 128.26, 127.62, 127.36, 126.34, 125.77, 125.49, 122.68, 118.56, 118.12, 113.87, 111.15. HRMS (ES+) calcd. for  $\text{C}_{20}\text{H}_{15}\text{N}$  [ $\text{M}$ ] $^+$ : 270.1283, found: 270.1279.

**3-(2-methoxyphenyl)-1-phenylindolizine (3t)**

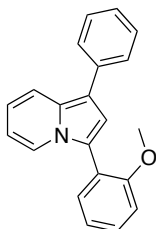

Reaction time: 4h; 80% yield (0.4 mmol, 120 mg), eluent: EtOAc/Pentane = 1/9.  $^1\text{H}$  NMR (500 MHz,  $\text{CDCl}_3$ ):  $\delta$  ppm 7.82 (d,  $J$  = 9.1 Hz, 1H), 7.68 (t,  $J$  = 6.0 Hz, 3H), 7.46 (m, 4H), 7.26 (t,  $J$  = 7.4 Hz, 1H), 7.11-7.08 (m, 2H), 7.07 (s, 1H), 6.79 (dd,  $J$  = 9.1, 6.4 Hz, 1H), 6.51 (t,  $J$  = 6.8 Hz, 1H), 3.85 (s, 3H).  $^{13}\text{C}$  NMR (126 MHz,  $\text{CDCl}_3$ ):  $\delta$  ppm 157.24, 136.58, 132.24, 129.96, 129.45, 128.68, 127.61, 125.18, 124.62, 122.82, 120.96, 118.05, 117.80, 114.67, 114.36, 111.11, 110.11, 55.48. HRMS (ES+) calcd. for  $\text{C}_{21}\text{H}_{17}\text{NO}$  [ $\text{M}$ ] $^+$ : 300.1388, found: 300.1385.



### 3-benzyl-1-phenylindolizine (3u)

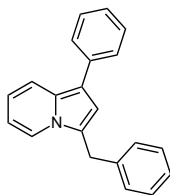

Reaction time: 4h; 67% yield (0.34 mmol, 95 mg), eluent: EtOAc/Hexane = 1/19.  $^1\text{H}$  NMR (500 MHz,  $\text{CDCl}_3$ ):  $\delta$  ppm 7.78 (d,  $J$  = 9.1 Hz, 1H), 7.66 (d,  $J$  = 7.1 Hz, 1H), 7.62 (d,  $J$  = 7.1 Hz, 2H), 7.43 (t,  $J$  = 7.7 Hz, 2H), 7.33 (t,  $J$  = 7.3 Hz, 2H), 7.27-7.23 (m, 4H), 6.82 (s, 1H), 6.73 (dd,  $J$  = 9.1, 6.5 Hz, 1H), 6.49 (t,  $J$  = 6.8 Hz, 1H), 4.27 (s, 2H).  $^{13}\text{C}$  NMR (126 MHz,  $\text{CDCl}_3$ ):  $\delta$  ppm 137.65, 136.55, 129.34, 128.71, 128.68, 128.51, 127.42, 126.59, 125.14, 122.77, 122.33, 118.34, 117.07, 113.61, 110.62, 32.56. HRMS (ES+) calcd. for  $\text{C}_{21}\text{H}_{17}\text{N}$  [M] $^+$ : 284.1439, found: 284.1445.

### 3-cyclohexyl-1-phenylindolizine (3v)

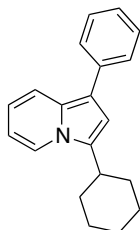

Reaction time: 8h; 50% yield (0.25 mmol, 69 mg), eluent: EtOAc/Pentane = 1/19.  $^1\text{H}$  NMR (500 MHz,  $\text{CDCl}_3$ ):  $\delta$  ppm 7.81 (d,  $J$  = 7.1 Hz, 1H), 7.74 (d,  $J$  = 9.1 Hz, 1H), 7.60 (d,  $J$  = 8.0 Hz, 2H), 7.41 (t,  $J$  = 7.8 Hz, 2H), 7.21 (t,  $J$  = 7.4 Hz, 1H), 6.78 (s, 1H), 6.69 (dd,  $J$  = 8.7, 6.8 Hz, 1H), 6.53 (t,  $J$  = 6.3 Hz, 1H), 2.84 (quintet,  $J$  = 9.5 Hz, 1H), 2.16-1.90 (m, 4H), 1.57-1.45 (m, 6H).  $^{13}\text{C}$  NMR (126 MHz,  $\text{CDCl}_3$ ):  $\delta$  ppm 136.77, 130.40, 128.65, 127.41, 124.98, 122.11, 116.58, 113.58, 110.30, 109.36, 35.21, 31.77, 26.61, 26.40. HRMS (ES+) calcd. for  $\text{C}_{20}\text{H}_{21}\text{N}$  [M] $^+$ : 276.1752, found: 276.1748.

### 1-methyl-3-phenylindolizine (3w)

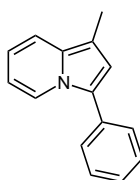

Reaction time: 12h; 41% yield (0.205 mmol, 42 mg), eluent: EtOAc/pentane = 1/50.  $^1\text{H}$  NMR (500 MHz,  $\text{CDCl}_3$ ):  $\delta$  ppm 8.24 (d,  $J$  = 7.2 Hz, 1H), 7.57 (d,  $J$  = 7.8 Hz, 2H), 7.47 (t,  $J$  = 7.7 Hz, 2H), 7.37 (d,  $J$  = 9.0 Hz, 1H), 7.33 (t,  $J$  = 7.4 Hz, 1H), 6.74 (s, 1H), 6.63 (dd,  $J$  = 8.8, 6.5 Hz, 1H), 6.43 (t,  $J$  = 6.7 Hz, 1H), 2.42 (s, 3H).  $^{13}\text{C}$  NMR (126 MHz,  $\text{CDCl}_3$ ):  $\delta$  ppm 132.67, 131.13, 128.92, 127.83, 126.80, 124.16, 122.07, 117.83, 115.42, 115.23, 110.28, 108.92, 10.51. HRMS (ES+) calcd. for  $\text{C}_{15}\text{H}_{13}\text{N}$  [M] $^+$ : 208.1126, found: 208.1119.

### 3-phenylindolizine (3x)

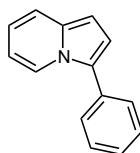

Reaction time: 1h; 54% yield (0.27 mmol, 52 mg), eluent: Hexanes.  $^1\text{H}$  NMR (500 MHz,  $\text{CDCl}_3$ ):  $\delta$  ppm 8.29 (d,  $J$  = 7.2 Hz, 1H), 7.58 (d,  $J$  = 7.7 Hz, 2H), 7.48 (t,  $J$  = 7.6 Hz, 2H), 7.43 (d,  $J$  = 9.0 Hz, 1H), 7.35 (t,  $J$  = 7.4 Hz, 1H), 6.88 (d,  $J$  = 3.9 Hz, 1H), 6.68 (t,  $J$  = 7.8 Hz, 1H), 6.55 (d,  $J$  = 3.7 Hz, 1H), 6.48 (t,  $J$  = 6.8 Hz, 1H).  $^{13}\text{C}$  NMR (126 MHz,  $\text{CDCl}_3$ ):  $\delta$  ppm 133.88, 132.60, 128.93, 128.05, 127.03, 125.42, 122.29, 119.64, 116.88, 114.11, 110.63, 99.78. HRMS (ES+) calcd. for  $\text{C}_{14}\text{H}_{11}\text{N}$  [M] $^+$ : 194.0970, found: 194.0970.

#### 4. Mechanistic Studies of the Cu-Catalyzed Transannulation Reaction

In order to verify a potential involvement of the Cu-acetylide **4** in this transformation, we performed several test-experiments. First, it was found that the reaction of pyridotriazole **1a** with only **4** did not produce the expected indolizine (eq. 1). However, the reaction of **1a** with **4** can be catalyzed by both  $\text{Cu}(\text{MeCN})_4\text{PF}_6$  (eq. 2) and  $\text{HPF}_6(\text{aq.})$  (eq. 3) to furnish indolizine **3a** in reasonable yields.

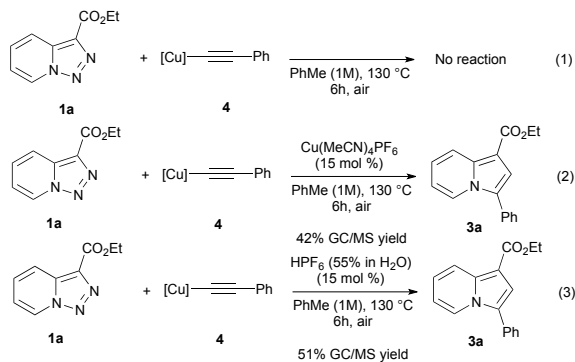

Deuterium-labeling experiments were performed to gain an additional insight into the reaction mechanism. It was found that addition of  $\text{D}_2\text{O}$  to the reaction of **1a** with **4** produced mainly the deuterium-incorporated product **d-3a** (eq. 4). Moreover, toluene solvent can also act as a marginal proton source (eq. 5-6). Finally, the reaction of **1a** with deuterium-labeled phenylacetylene<sup>3</sup> showed that the  $\text{D}^+$  released upon formation of copper acetylide **4** (path a, Scheme 2) or copper carbene **C** (path b, Scheme 2) was mainly incorporated in the indolizine product **d-3a** (eq. 7).

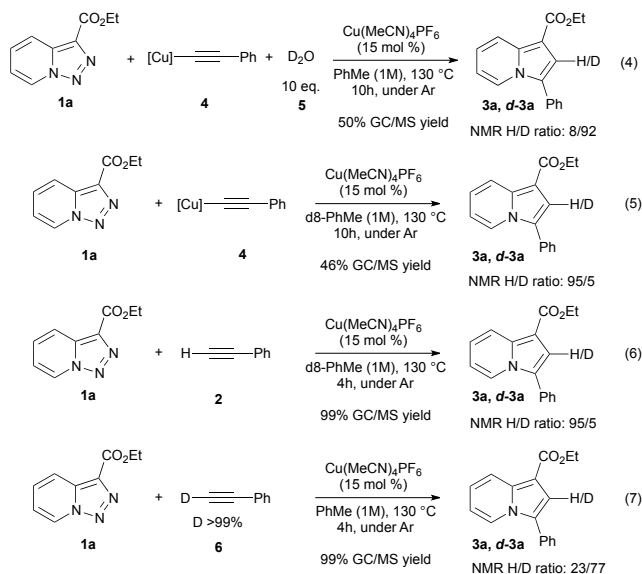

**Procedure:** An oven dried 1 mL Wheaton V-vial capped with a mininert syringe valve,

<sup>3</sup> After 2h, scrambling of deuterium-labeled phenylacetylene was observed with GC/MS: H/D ratio 20:80.

containing a stirring bar, was charged with a pyridotriazole **1a** (38.2 mg, 0.2 mmol, 1 equiv), catalyst (15 mol %), toluene (0.2 mL, 0.1M), additive, and phenylacetylene derivative<sup>4</sup> (0.24 mmol, 1.2 equiv) under the indicated atmosphere. The reaction mixture was stirred at 130 °C upon completion then was quenched with DCM and analyzed with GC-MS using pentadecane as internal standard (GC yields are given). The residue was then purified by column chromatography on triethylamine-treated silica gel (3% EtOAc/Hexane) to afford the corresponding indolizine **3** and calculate the H/D ratio.

---

<sup>4</sup> Prepared according to the literature procedure: M. Fukushima, D. Takushima, H. Satomura, G. Onodera and M. Kimura, *Chem.-Eur. J.*, 2012, **18**, 8019.

## 5. Copies of $^1\text{H}$ and $^{13}\text{C}$ NMR Spectra for Indolizines (3)

$^1\text{H}$  NMR spectrum of (3a)

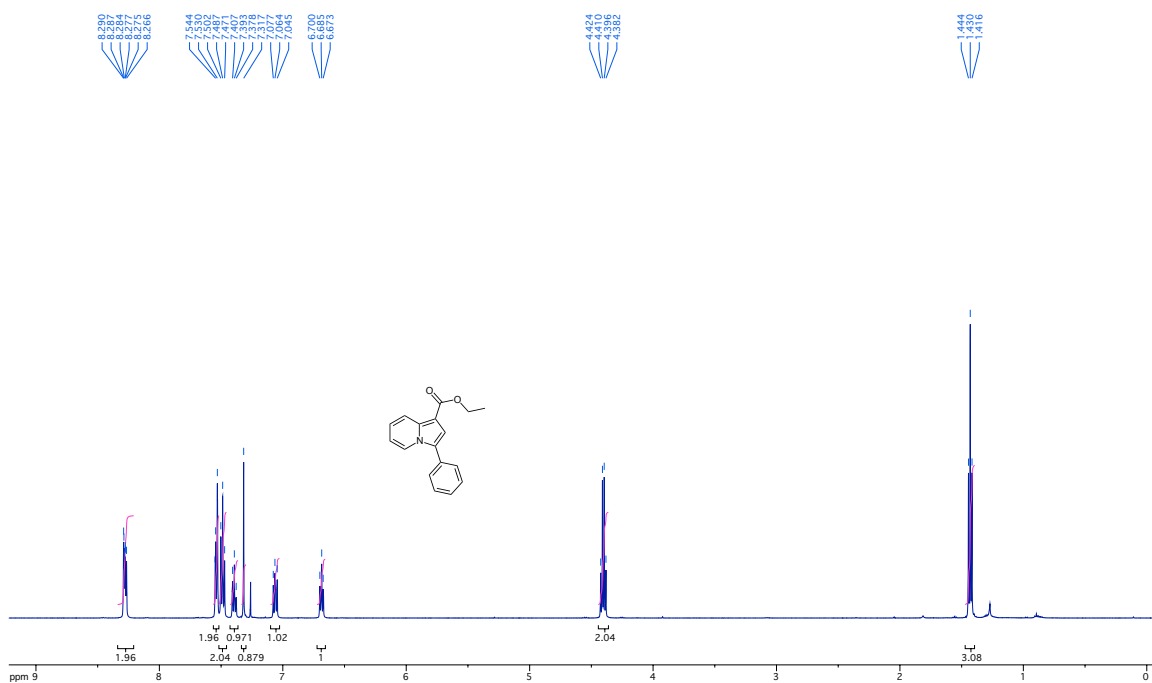

$^{13}\text{C}$  NMR spectrum of (3a)

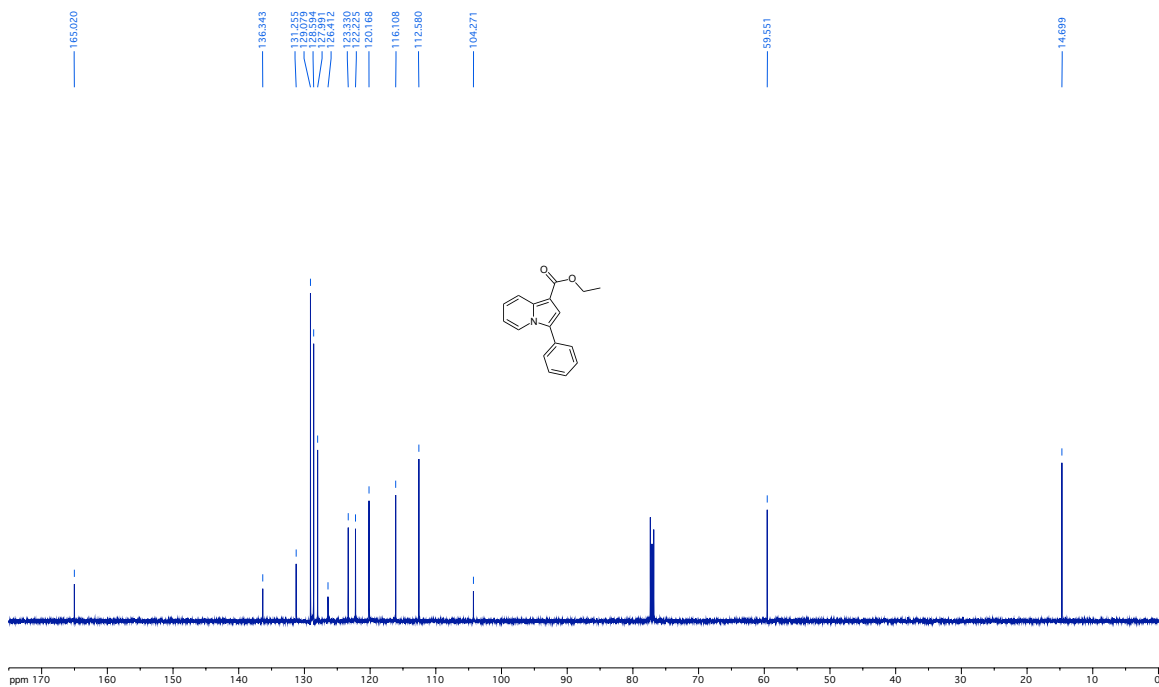



<sup>1</sup>H NMR spectrum of (3c)

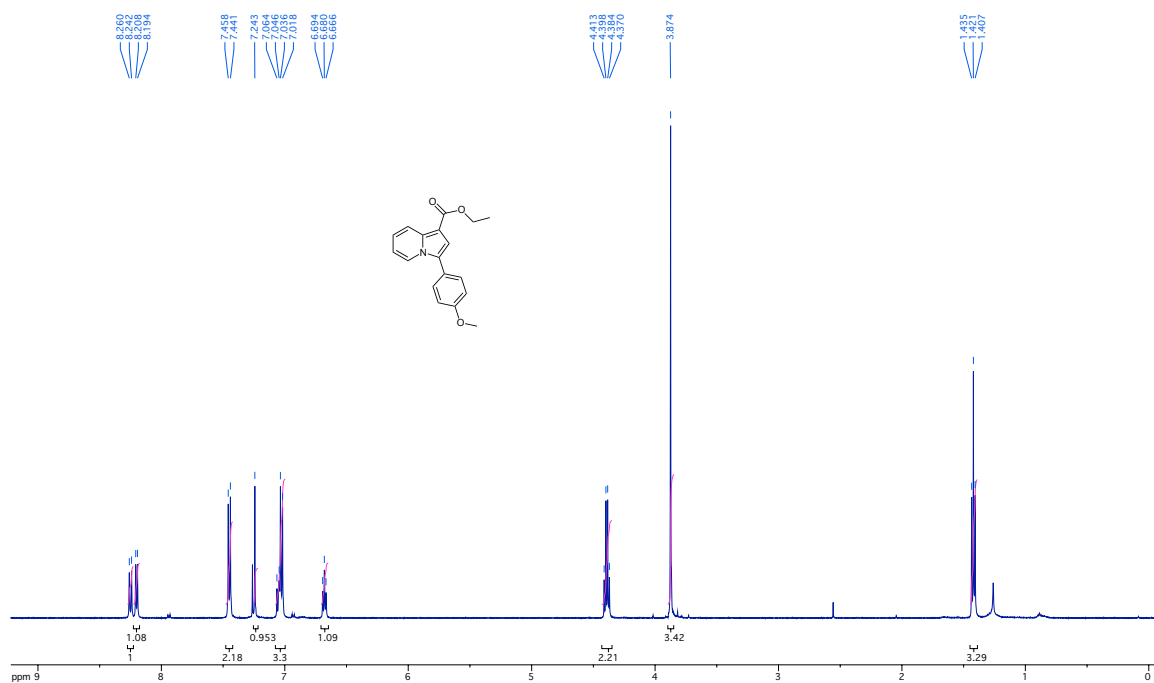

<sup>13</sup>C NMR spectrum of (3c)

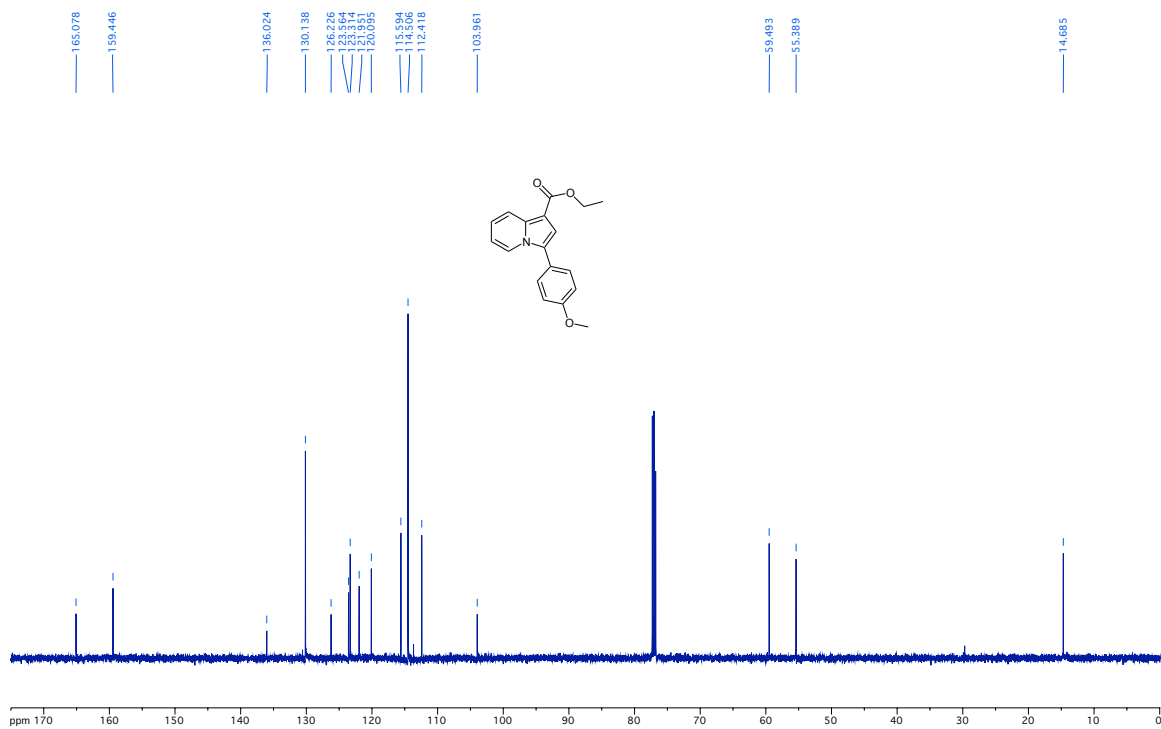

<sup>1</sup>H NMR spectrum of (3d)

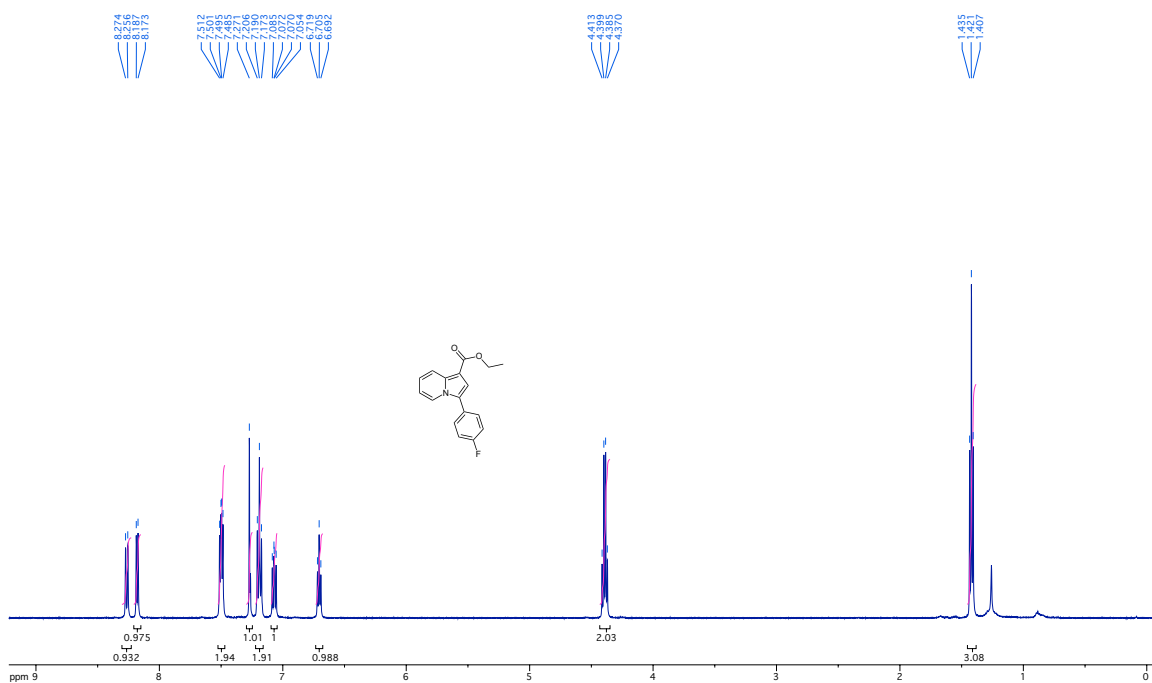

<sup>13</sup>C NMR spectrum of (3d)

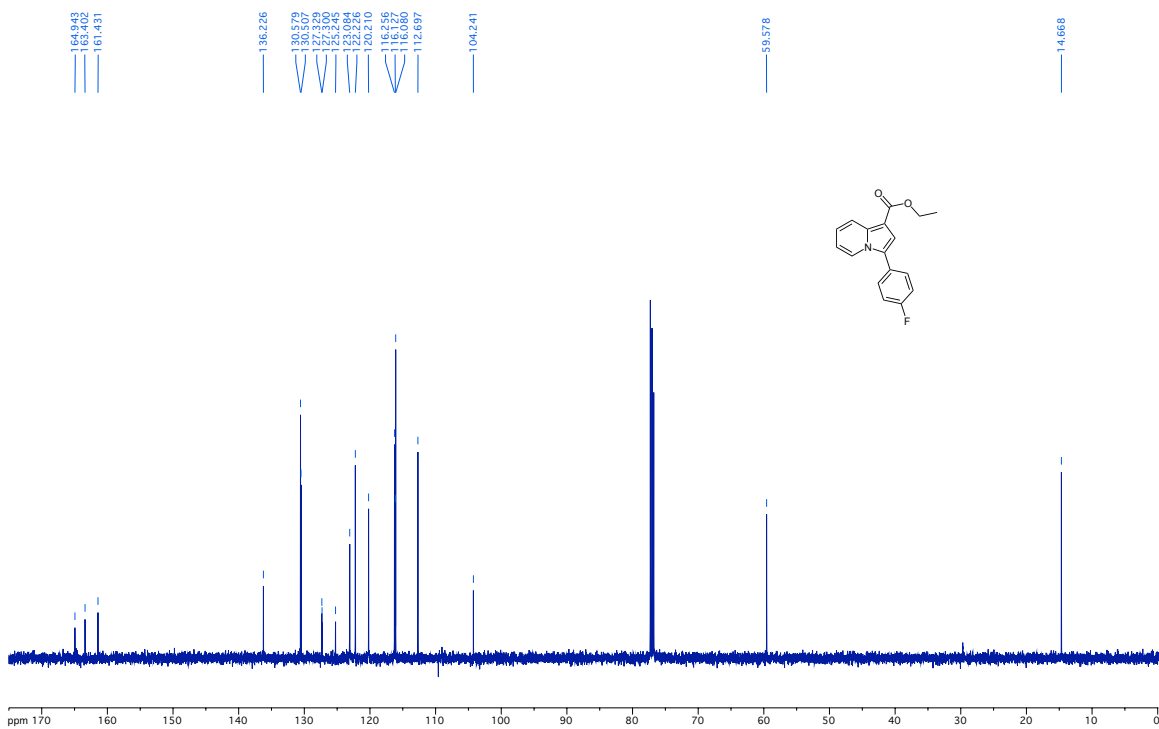

<sup>1</sup>H NMR spectrum of (3e)

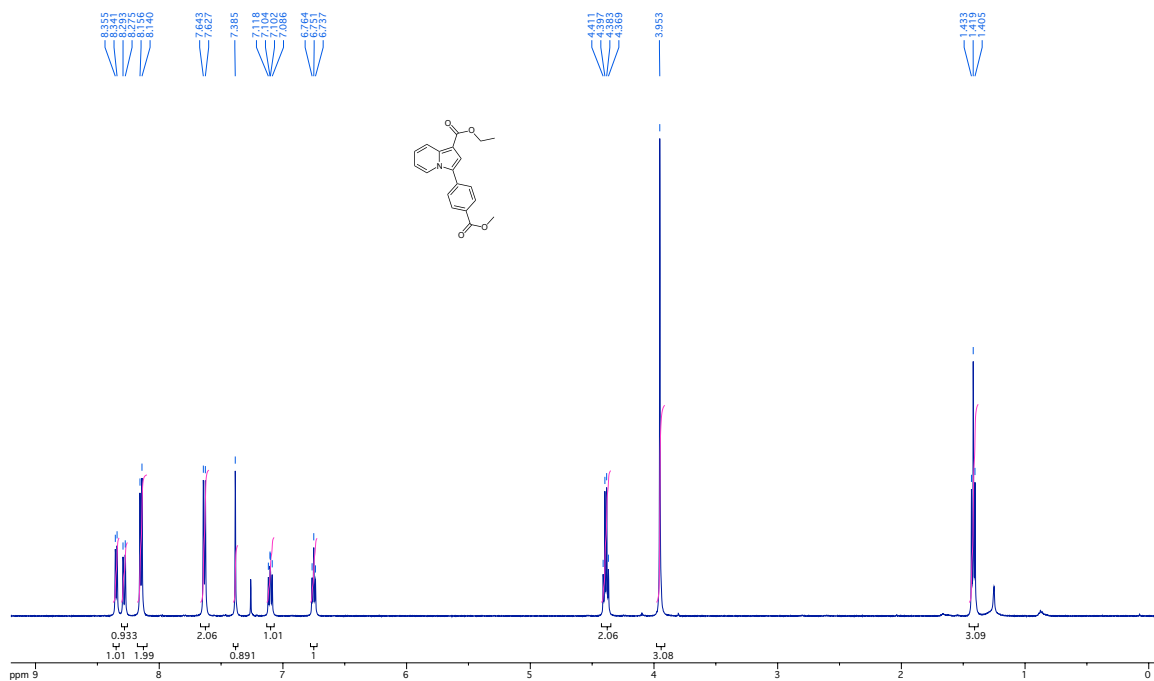

<sup>13</sup>C NMR spectrum of (3e)

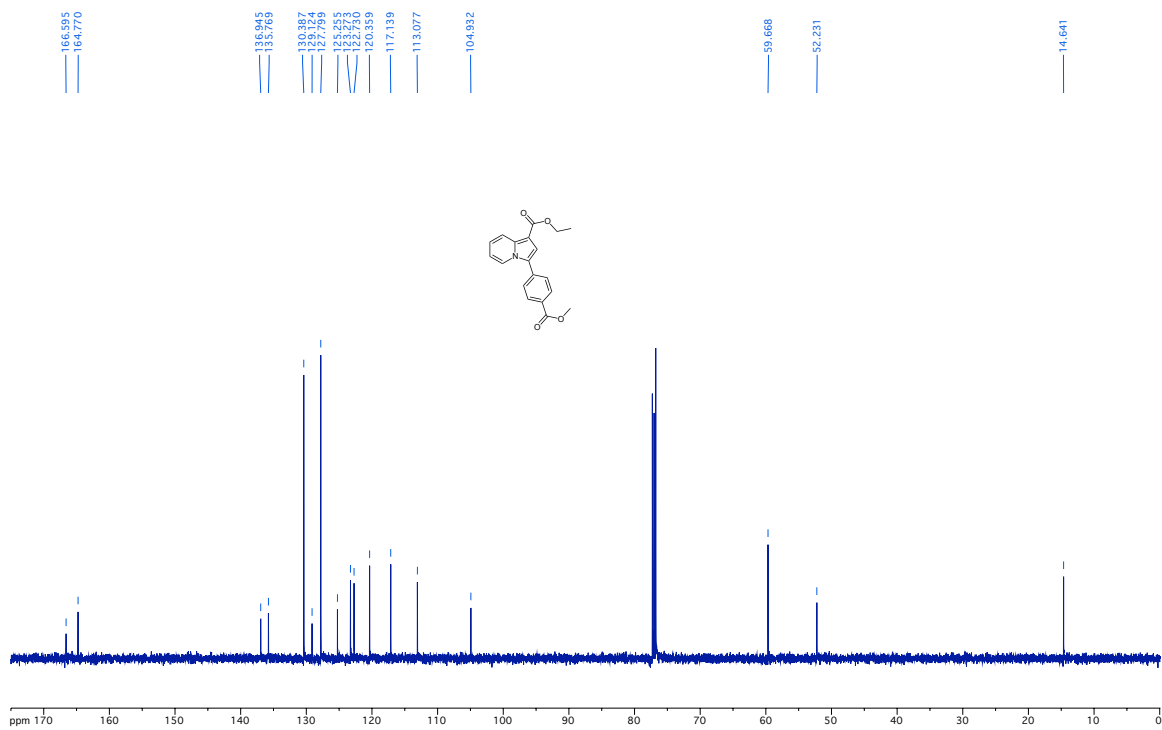



<sup>1</sup>H NMR spectrum of (3f)

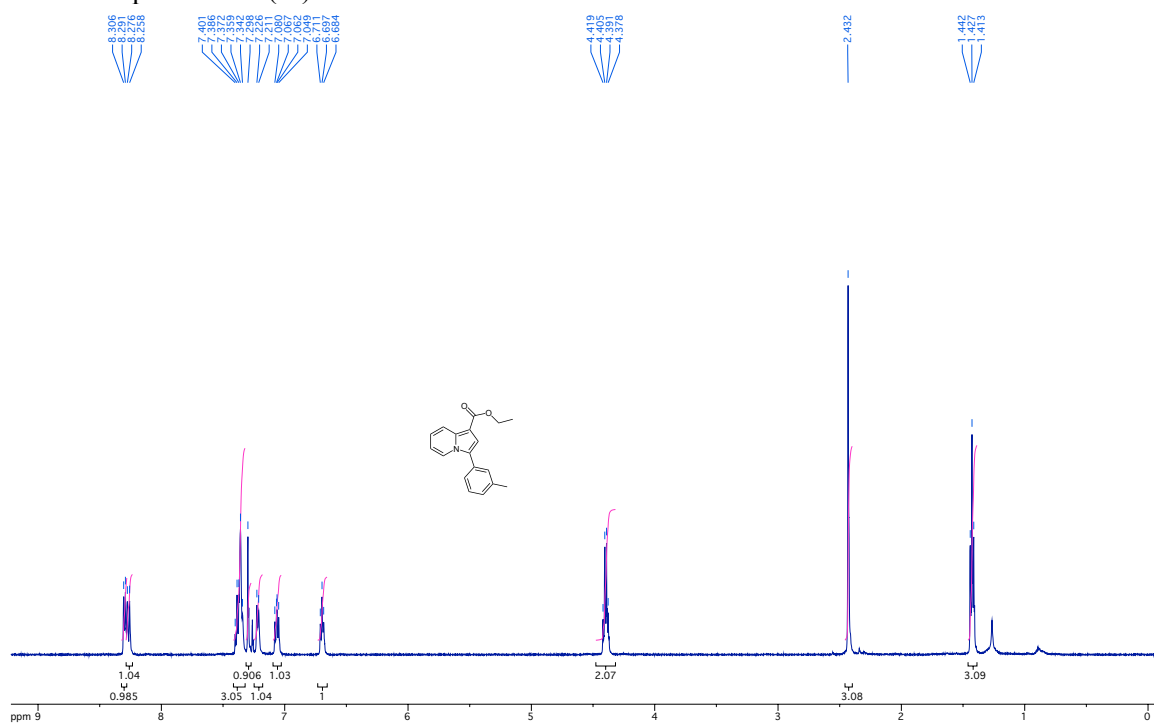

<sup>13</sup>C NMR spectrum of (3f)

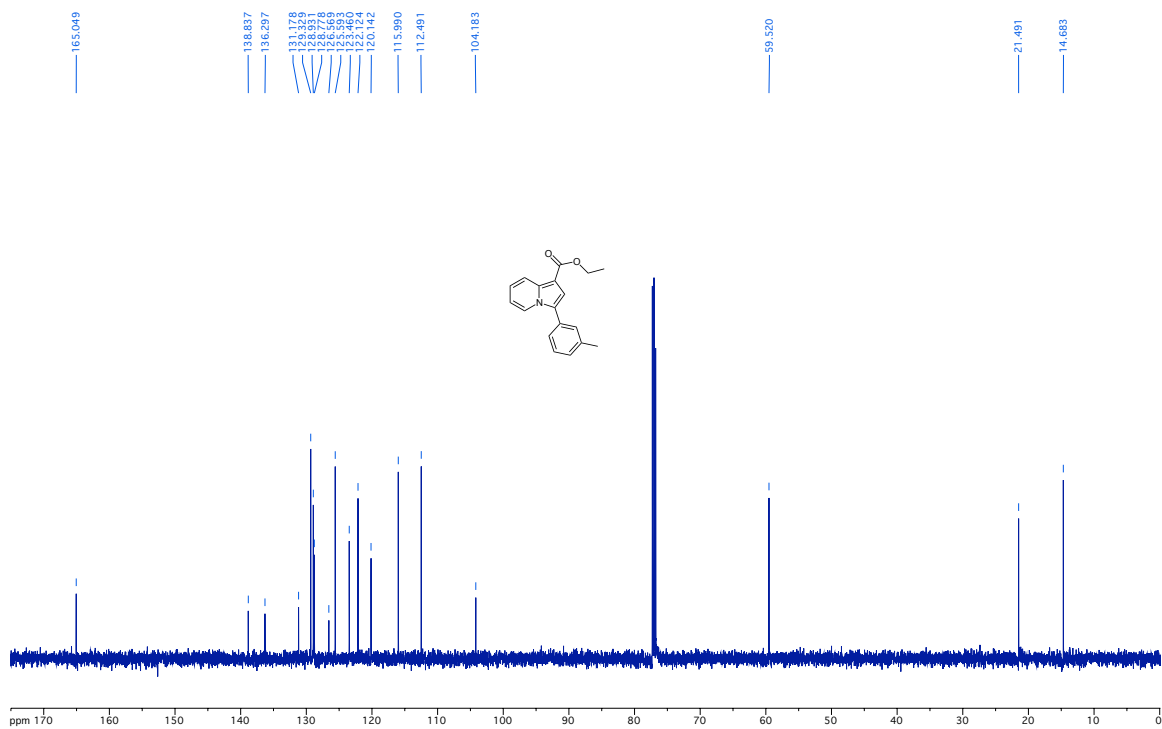

<sup>1</sup>H NMR spectrum of (3g)

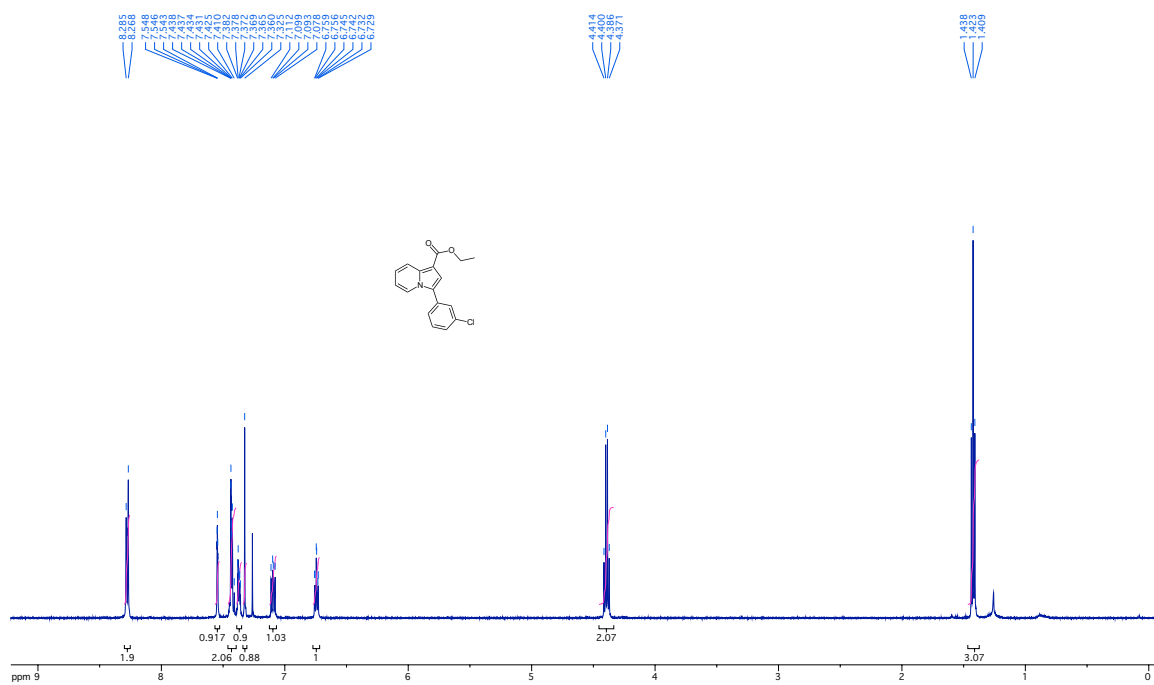

<sup>13</sup>C NMR spectrum of (3g)

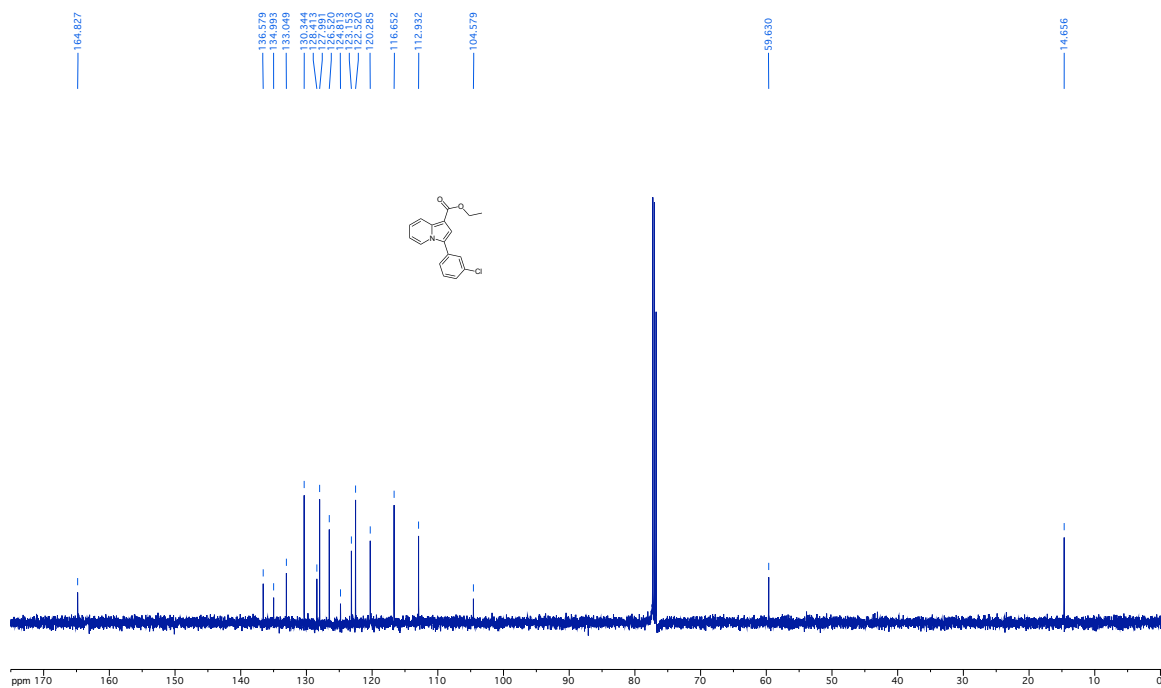

### $^1\text{H}$ NMR spectrum of (3h)

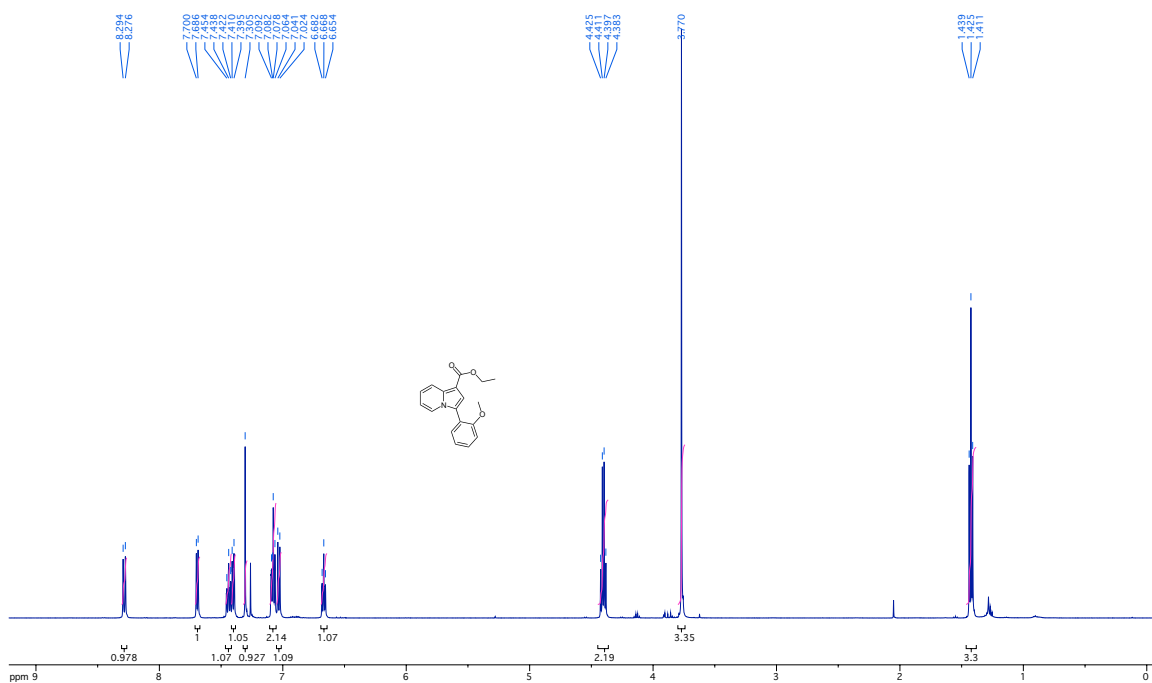

### $^{13}\text{C}$ NMR spectrum of (3h)

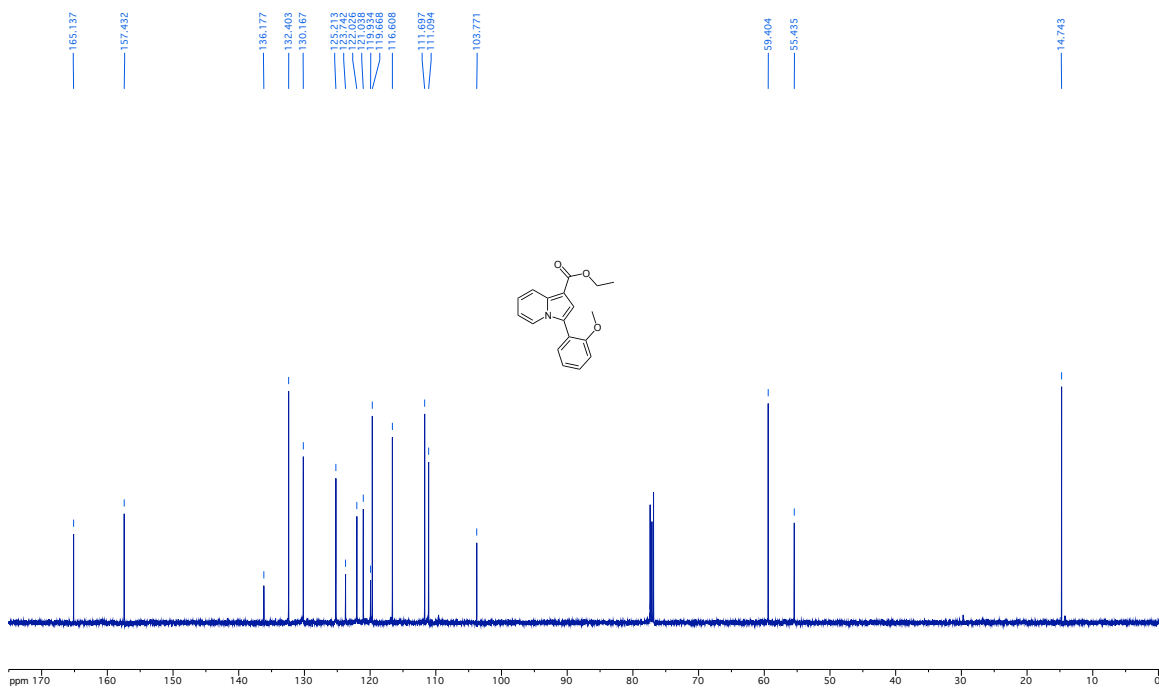

$^1\text{H}$  NMR spectrum of (**3i**)

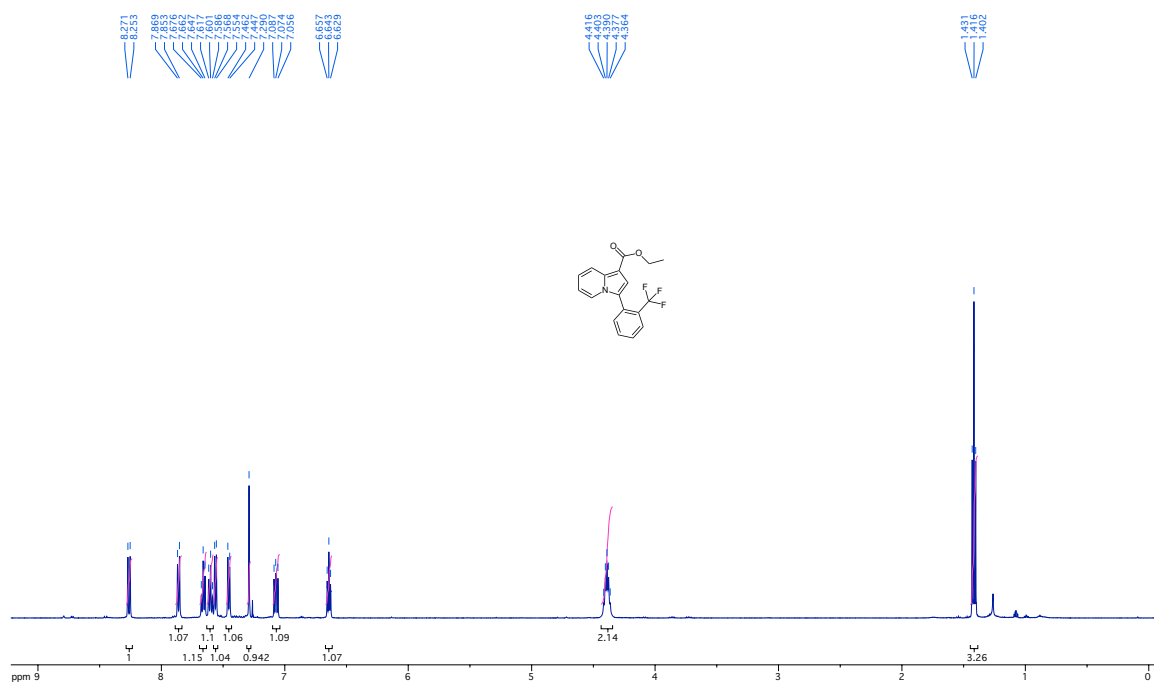

$^{13}\text{C}$  NMR spectrum of (**3i**)

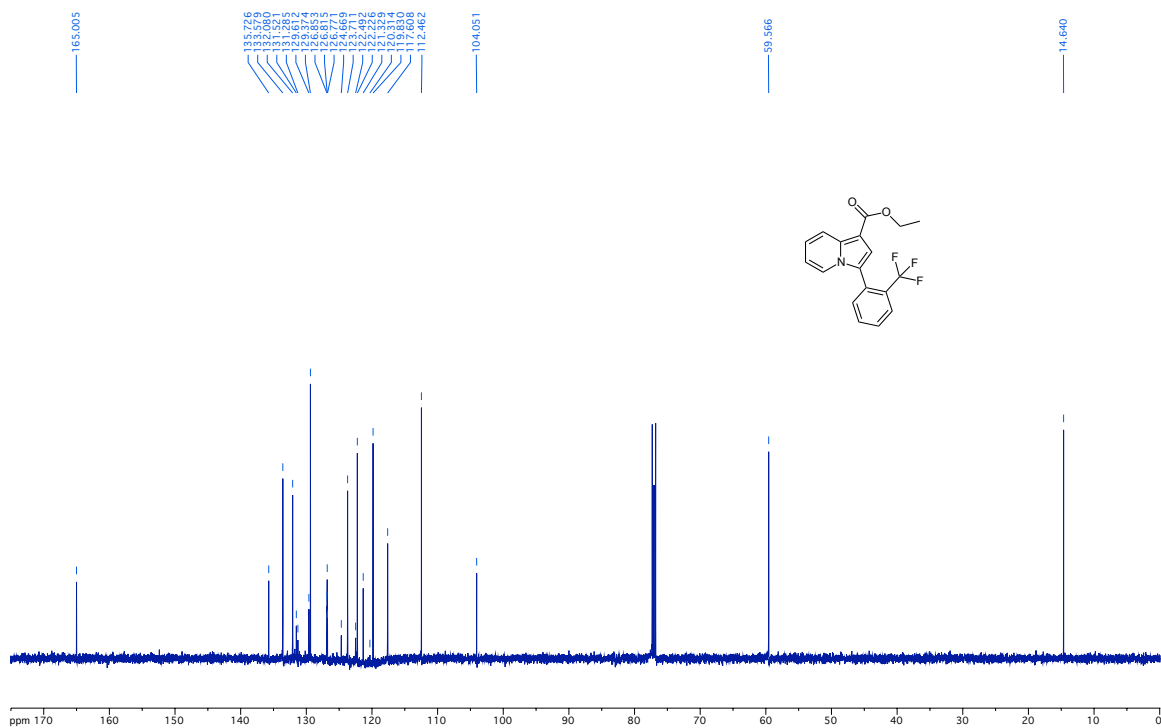

### <sup>1</sup>H NMR spectrum of (3j)

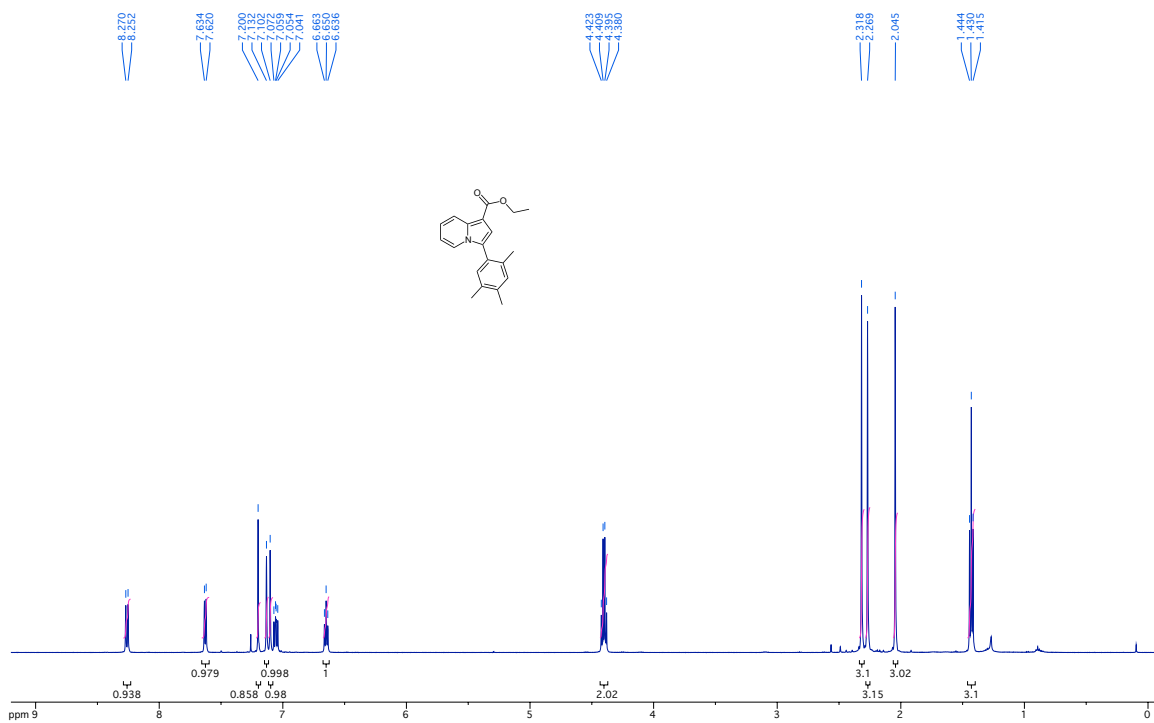

### <sup>13</sup>C NMR spectrum of (3j)

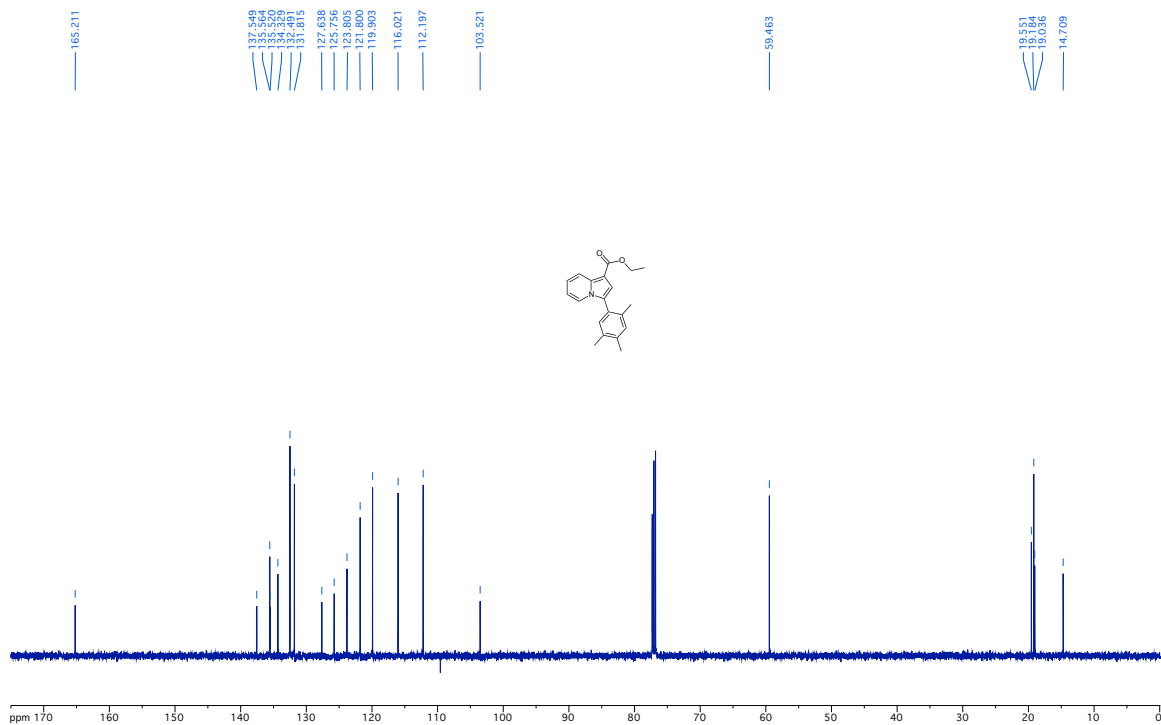

<sup>1</sup>H NMR spectrum of (**3k**)

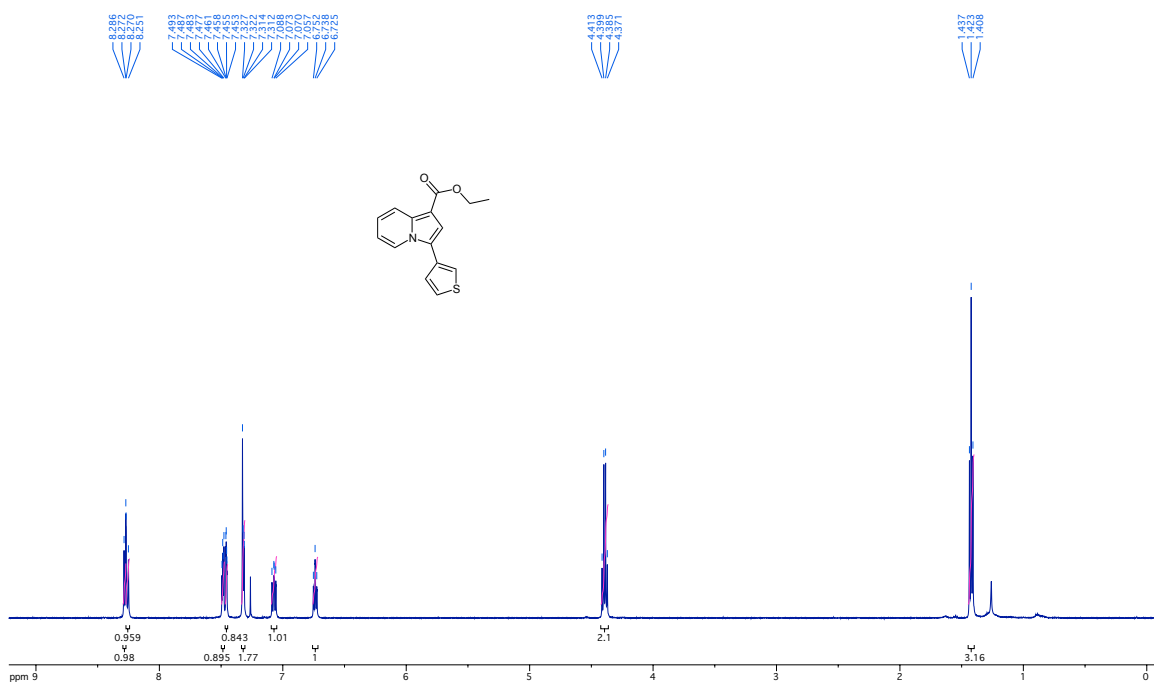

<sup>13</sup>C NMR spectrum of (**3k**)

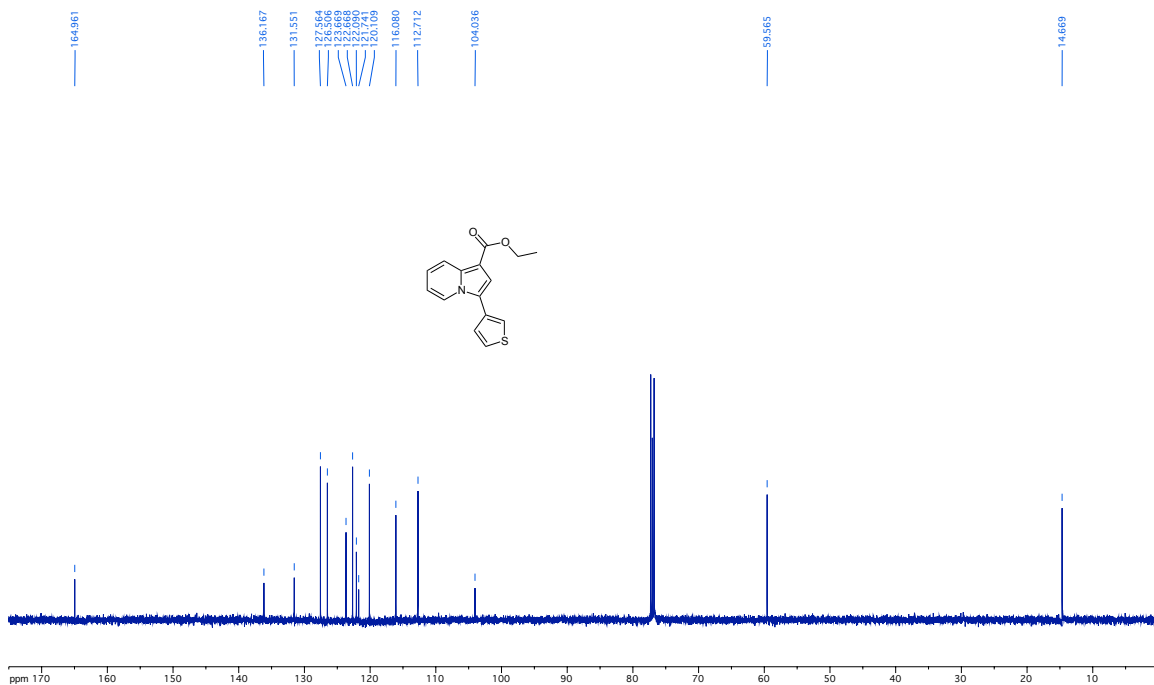

### <sup>1</sup>H NMR spectrum of (31)

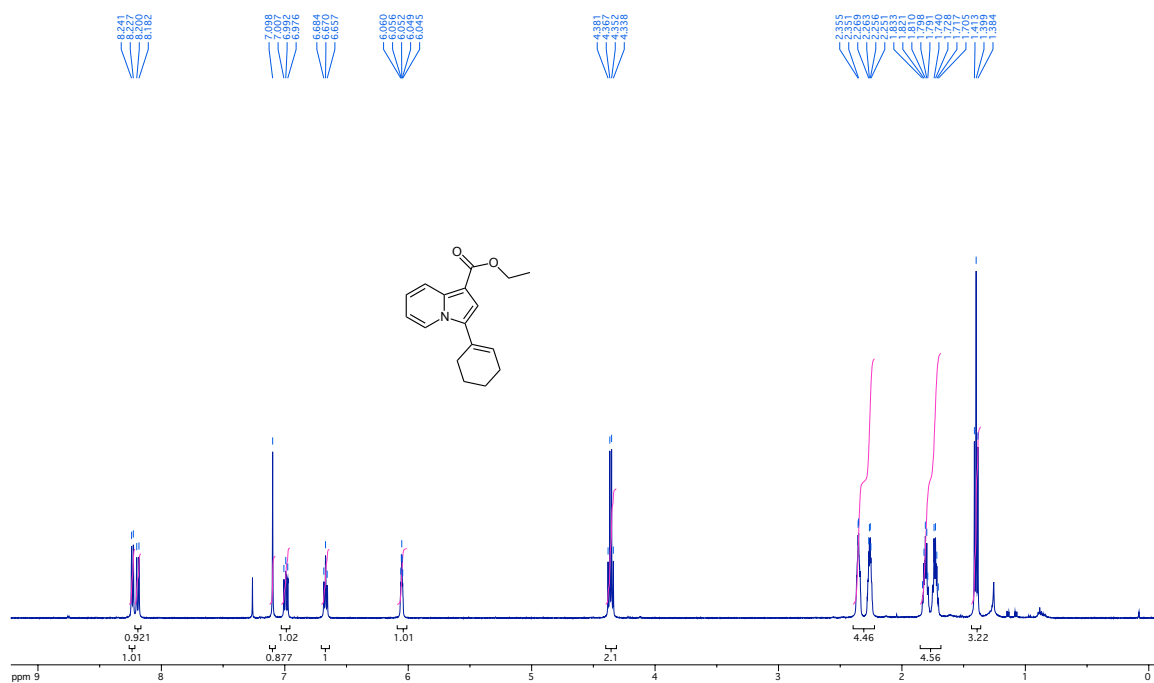

### <sup>13</sup>C NMR spectrum of (31)

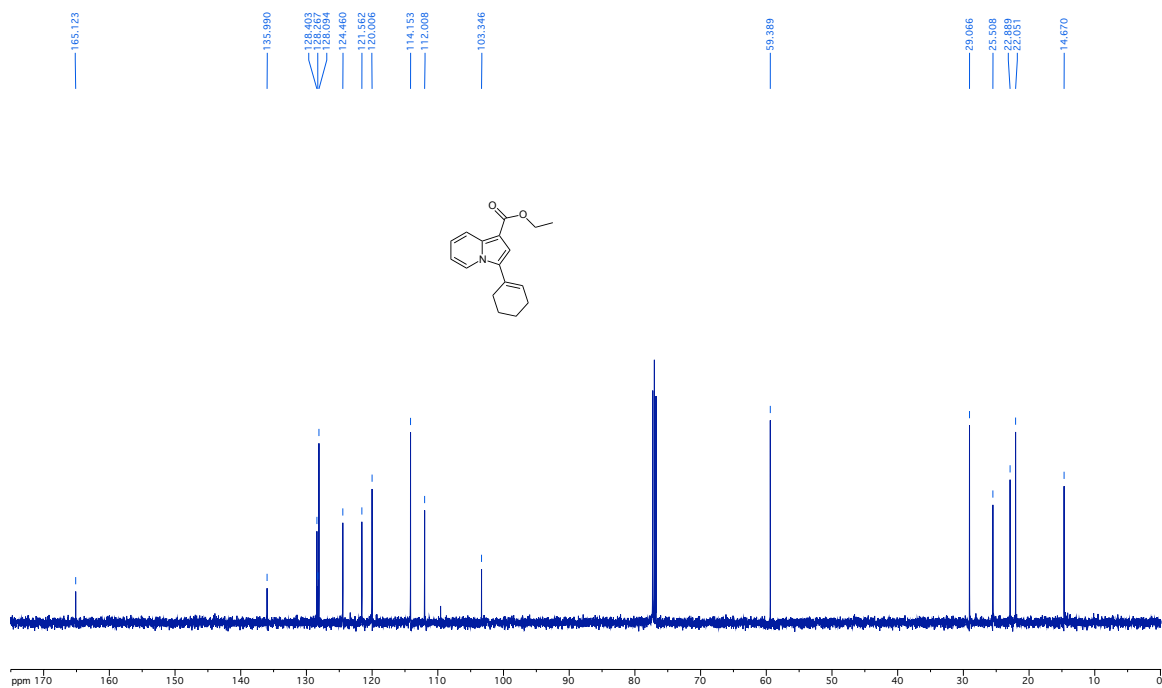

<sup>1</sup>H NMR spectrum of (3m)

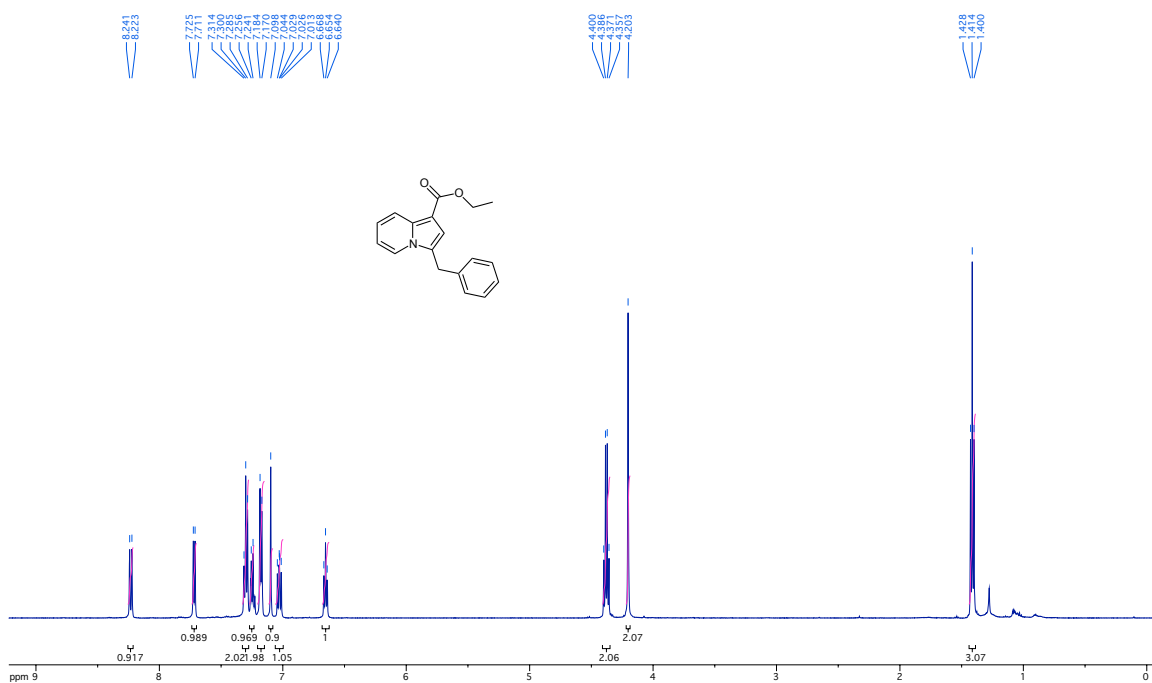

<sup>13</sup>C NMR spectrum of (3m)

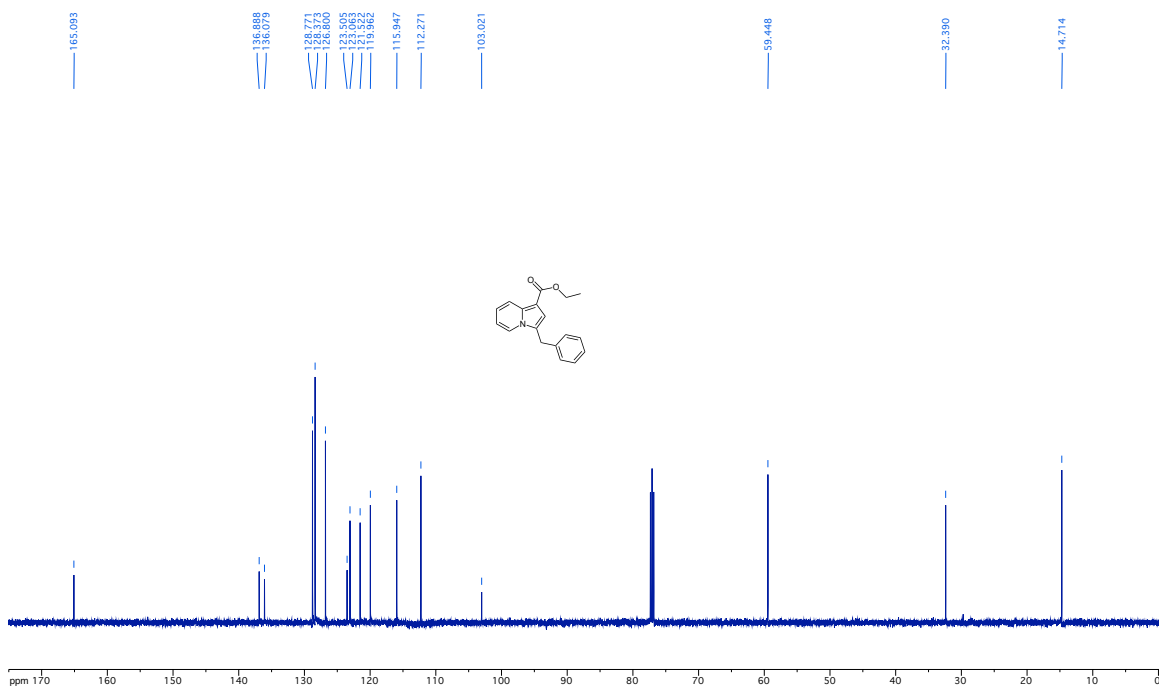



<sup>1</sup>H NMR spectrum of (3n)

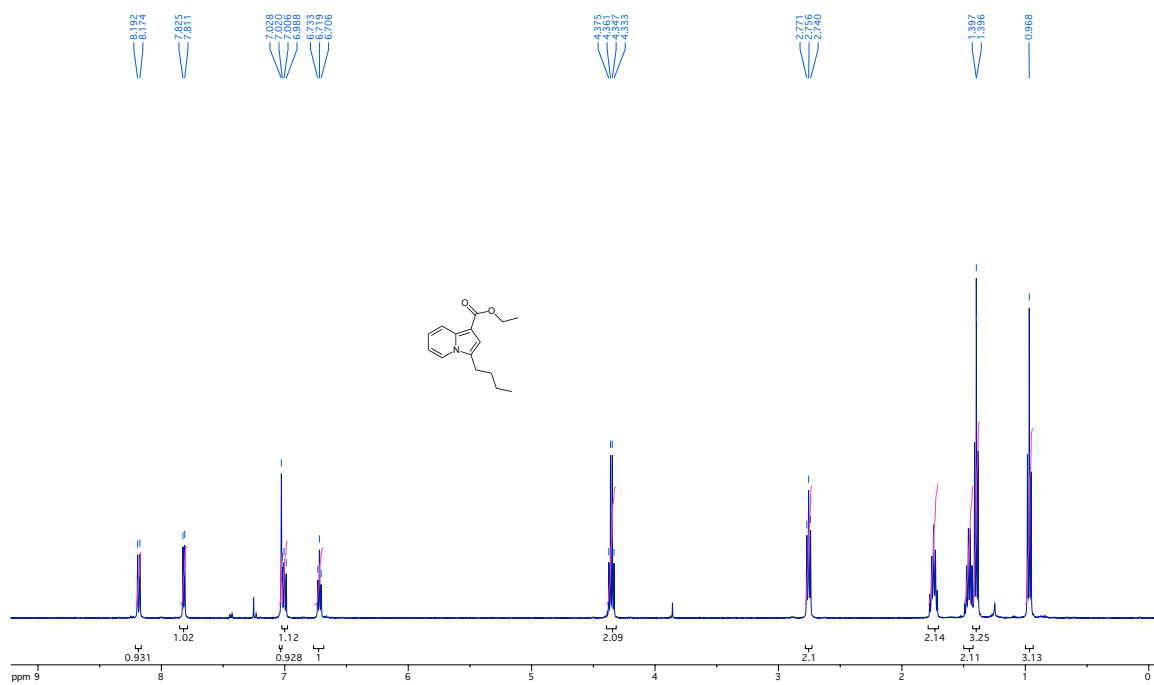

<sup>13</sup>C NMR spectrum of (3n)

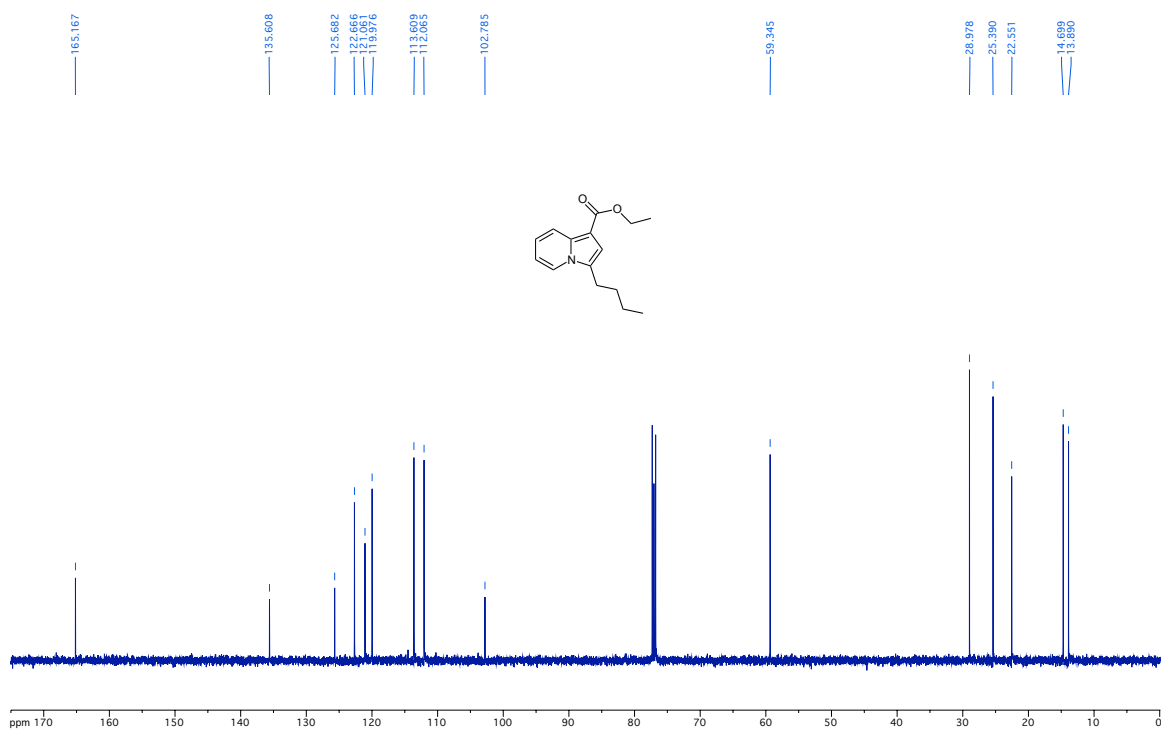

### <sup>1</sup>H NMR spectrum of (30)

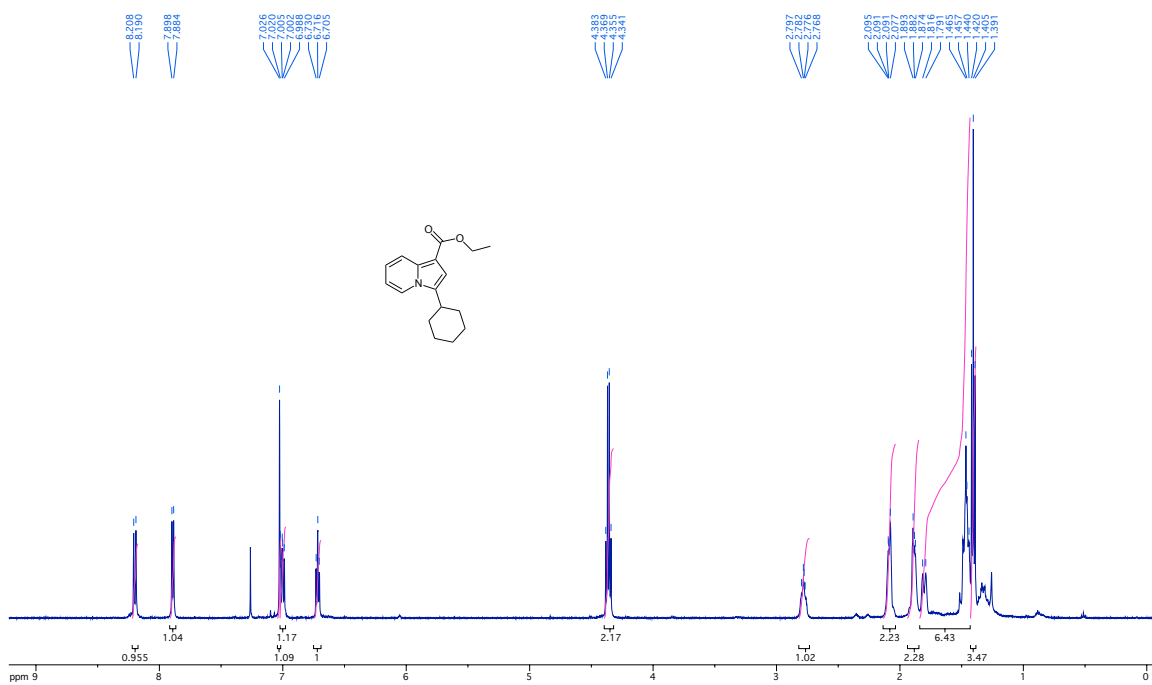

### <sup>13</sup>C NMR spectrum of (30)

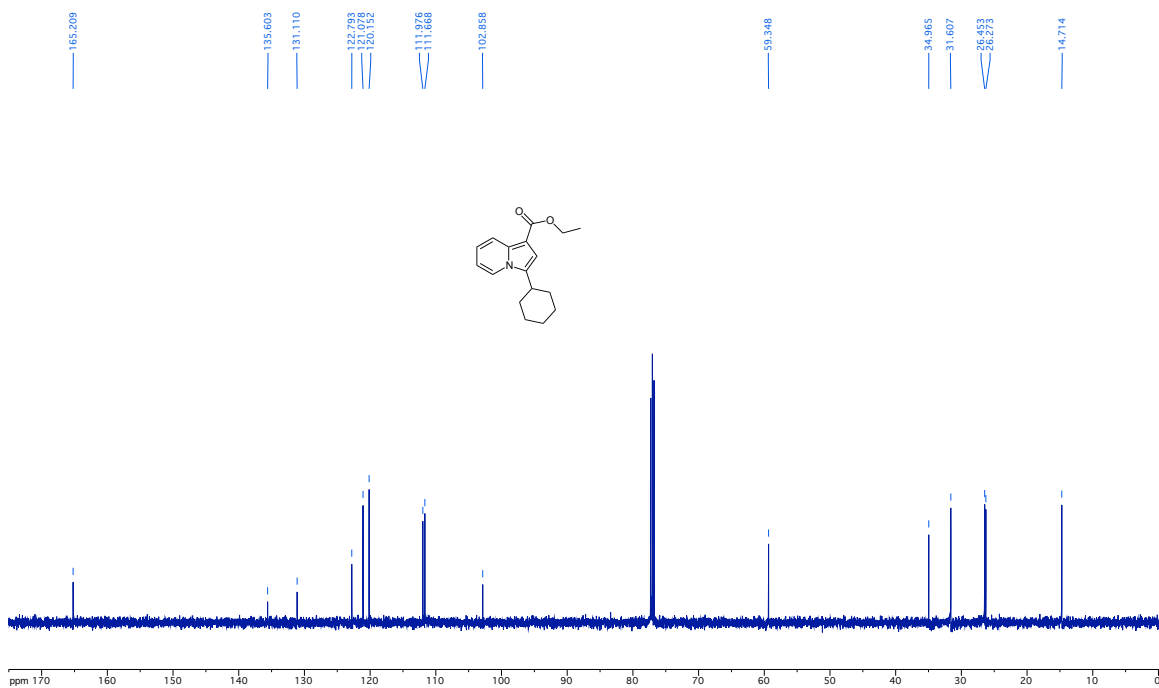

### <sup>1</sup>H NMR spectrum of (3p)

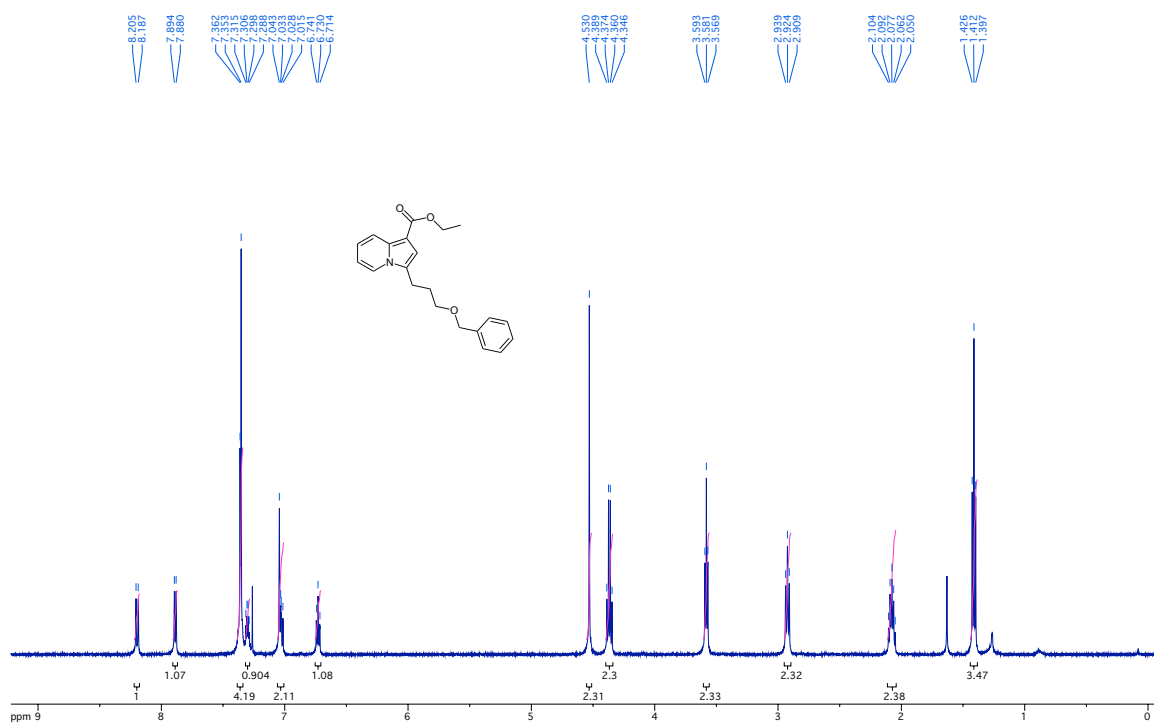

### <sup>13</sup>C NMR spectrum of (3p)

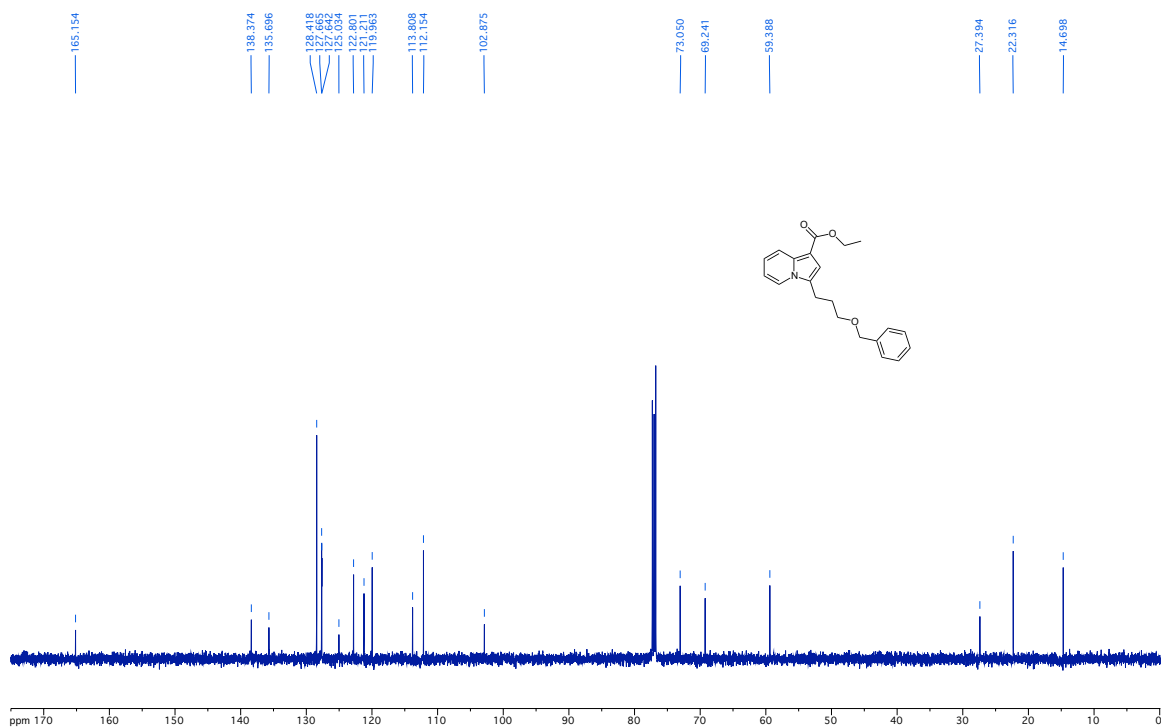

### <sup>1</sup>H NMR spectrum of (30)

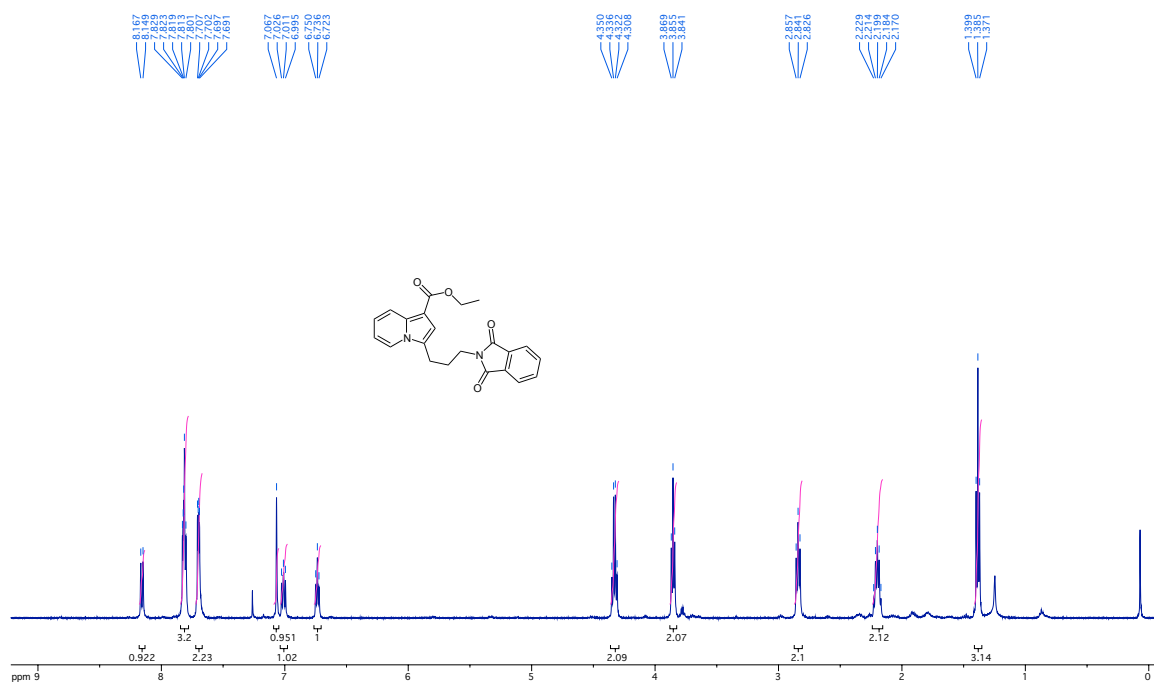

### <sup>13</sup>C NMR spectrum of (30)

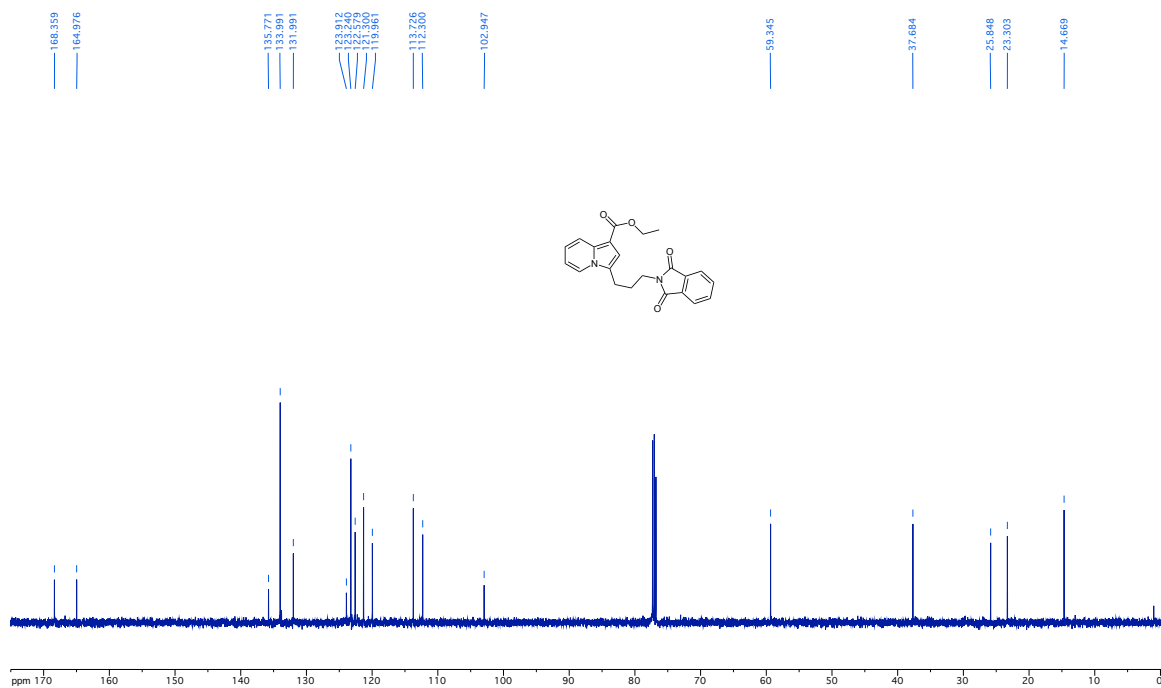

<sup>1</sup>H NMR spectrum of (3r)

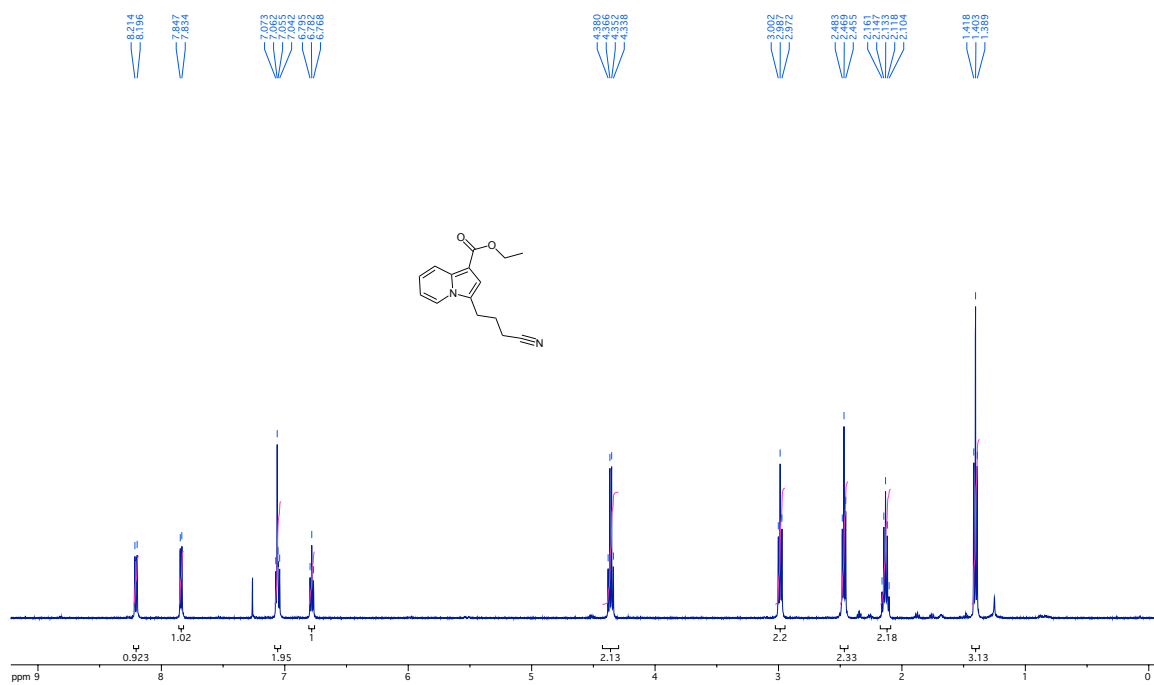

<sup>13</sup>C NMR spectrum of (3r)

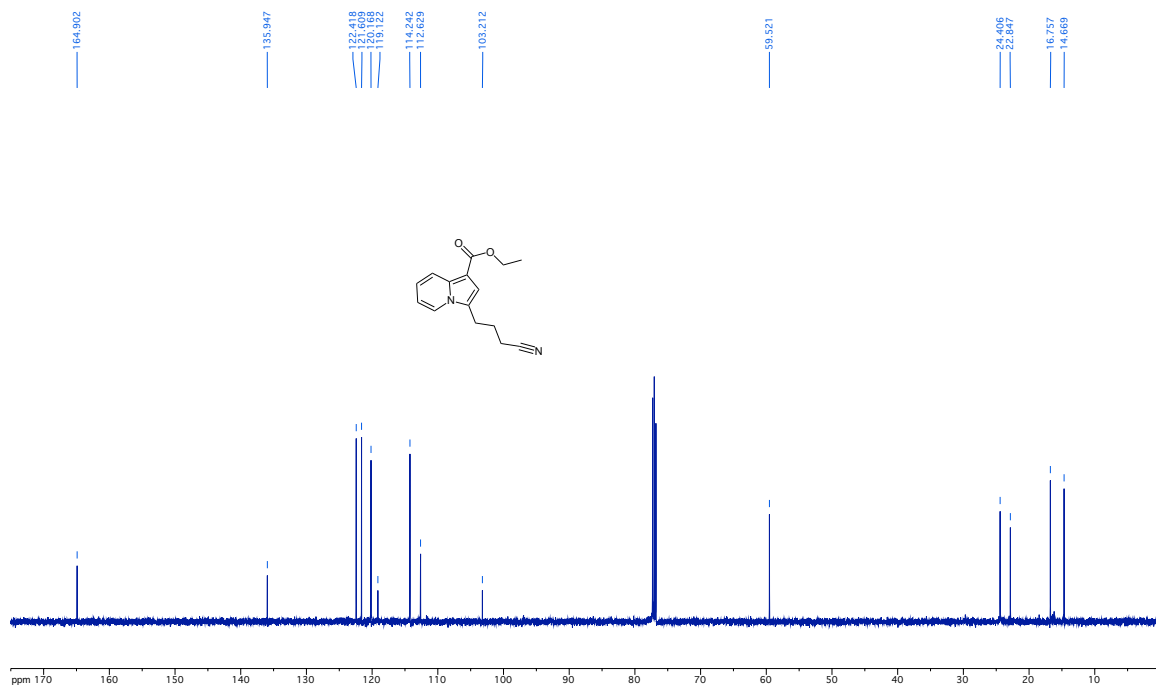

<sup>1</sup>H NMR spectrum of (3s)

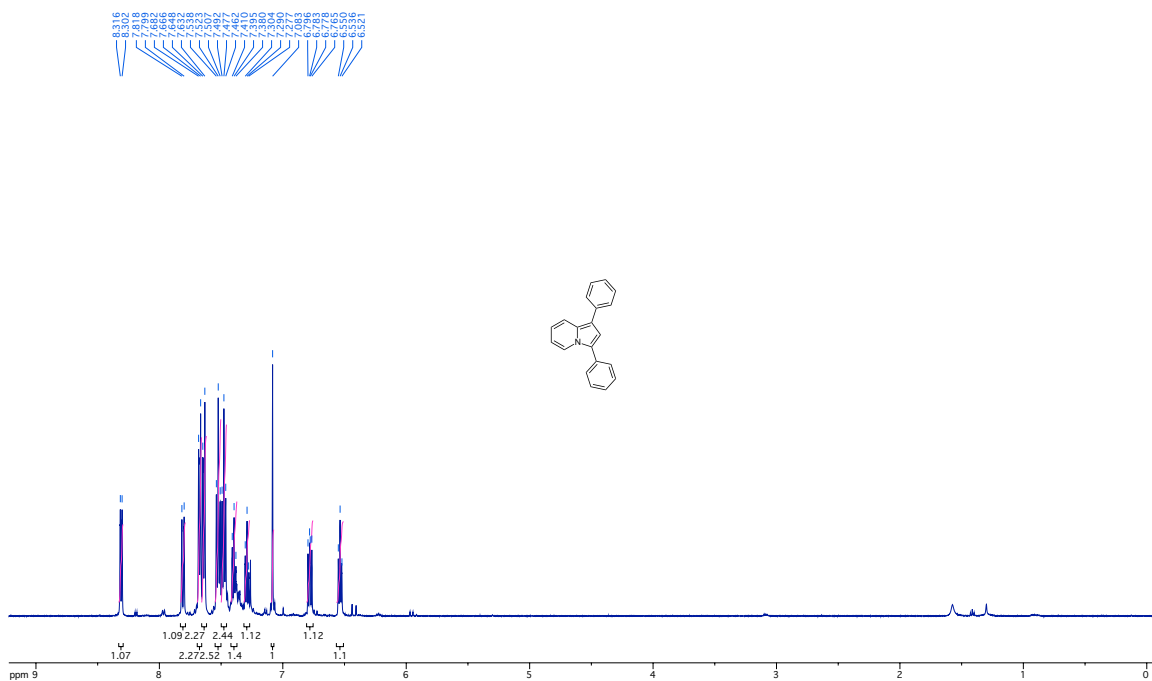

<sup>13</sup>C NMR spectrum of (3s)

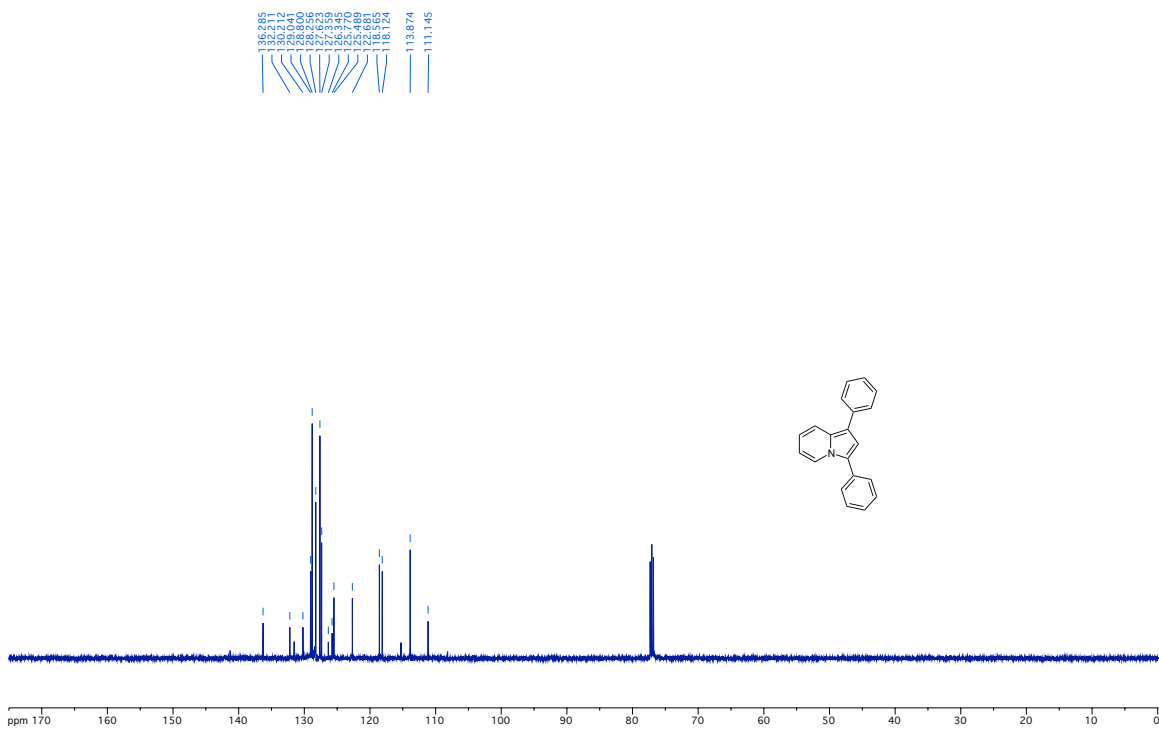

<sup>1</sup>H NMR spectrum of (3t)

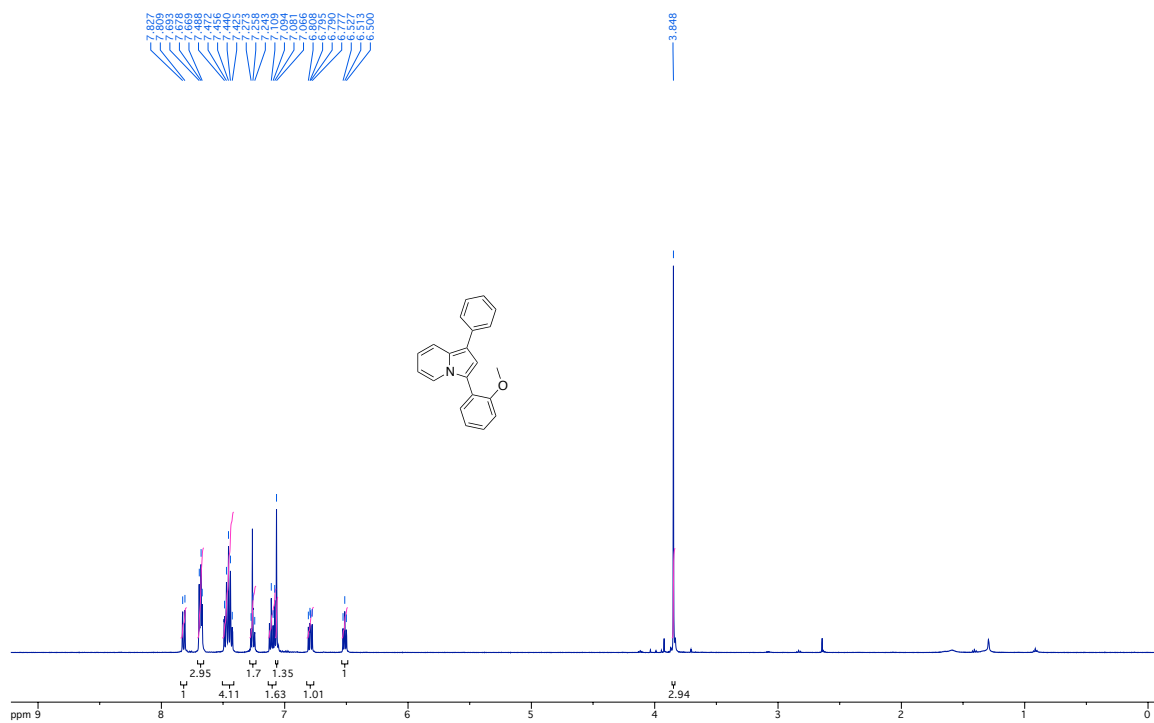

<sup>13</sup>C NMR spectrum of (3t)

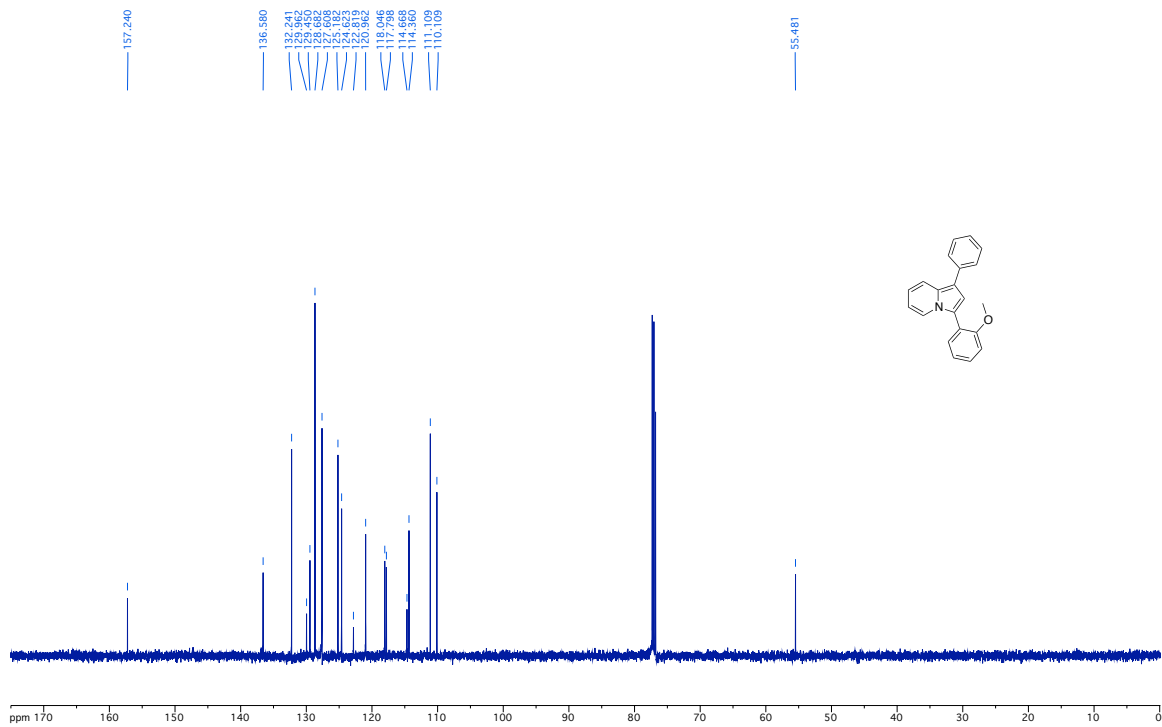

<sup>1</sup>H NMR spectrum of (**3u**)

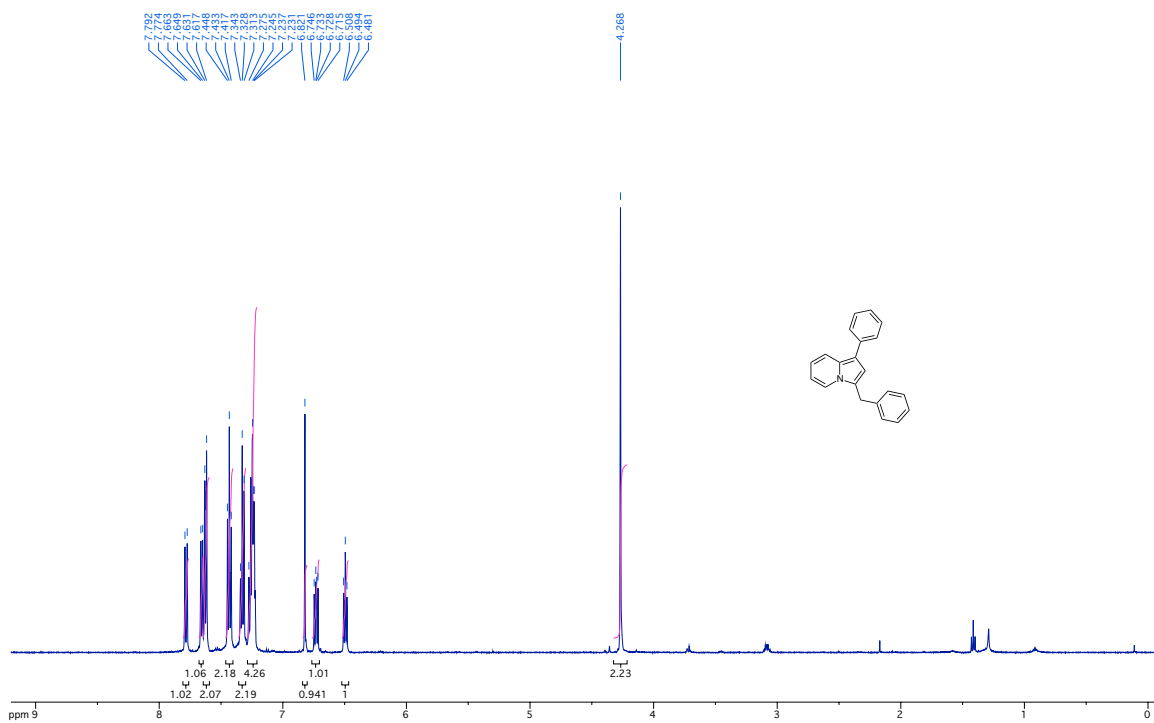

<sup>13</sup>C NMR spectrum of (**3u**)

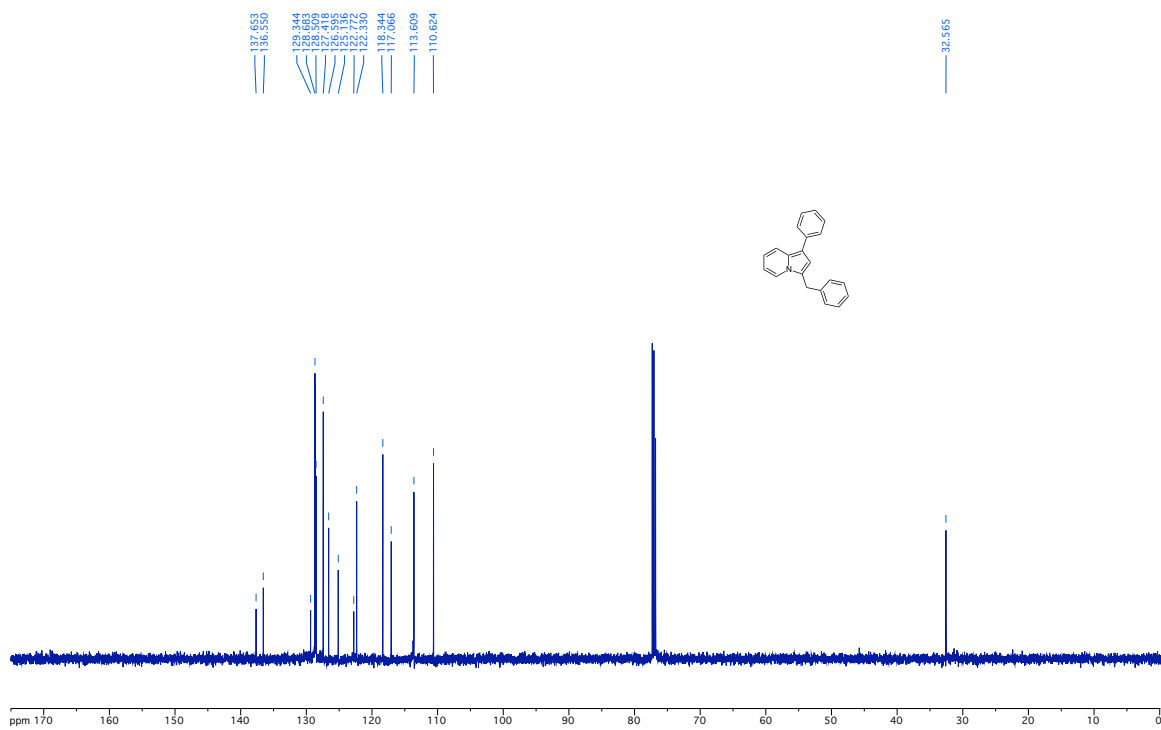



<sup>1</sup>H NMR spectrum of (3v)

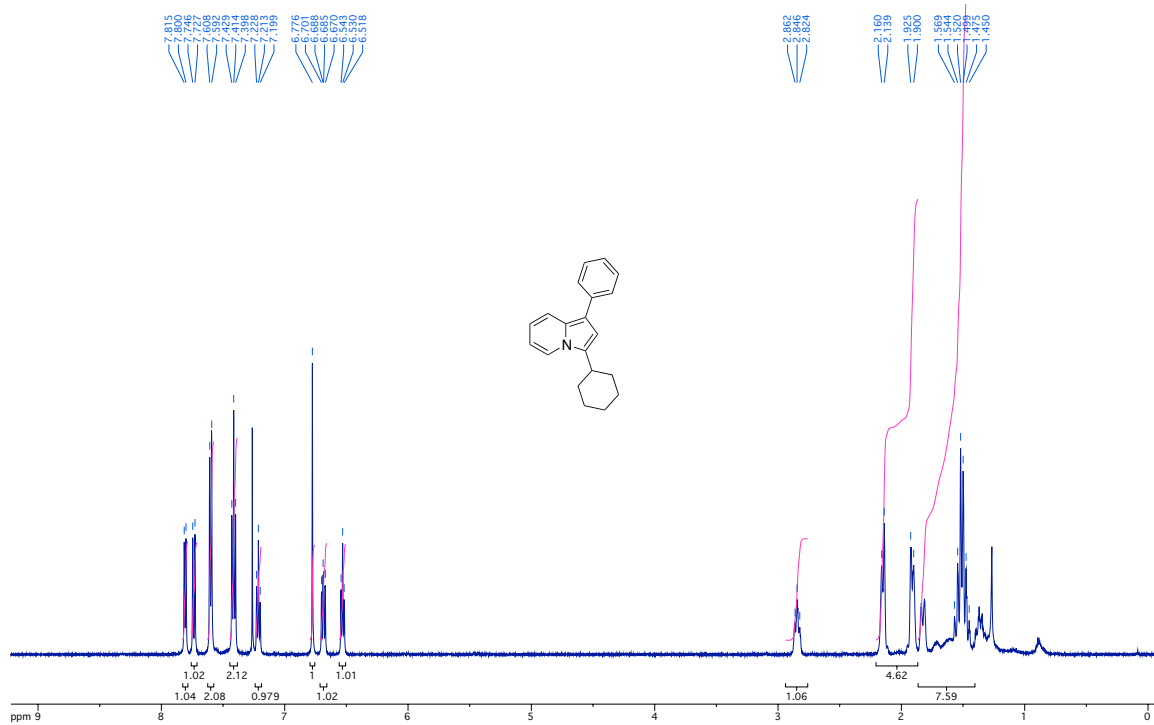

<sup>13</sup>C NMR spectrum of (3v)

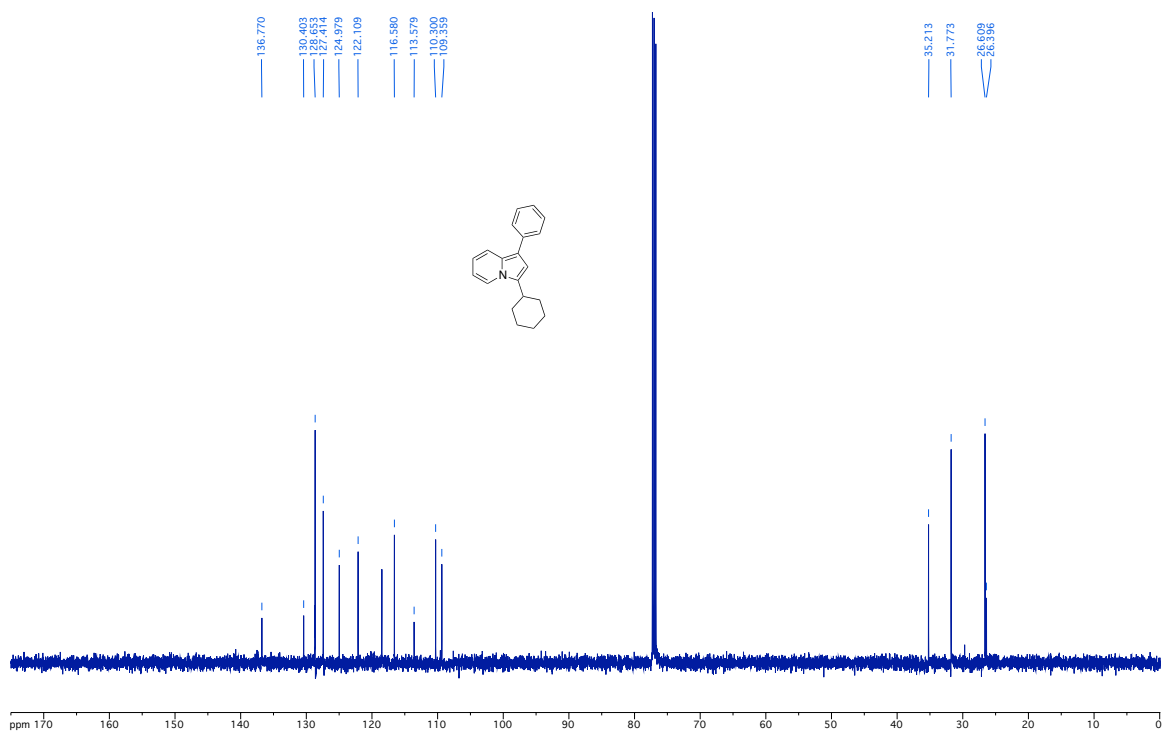

<sup>1</sup>H NMR spectrum of (3w)

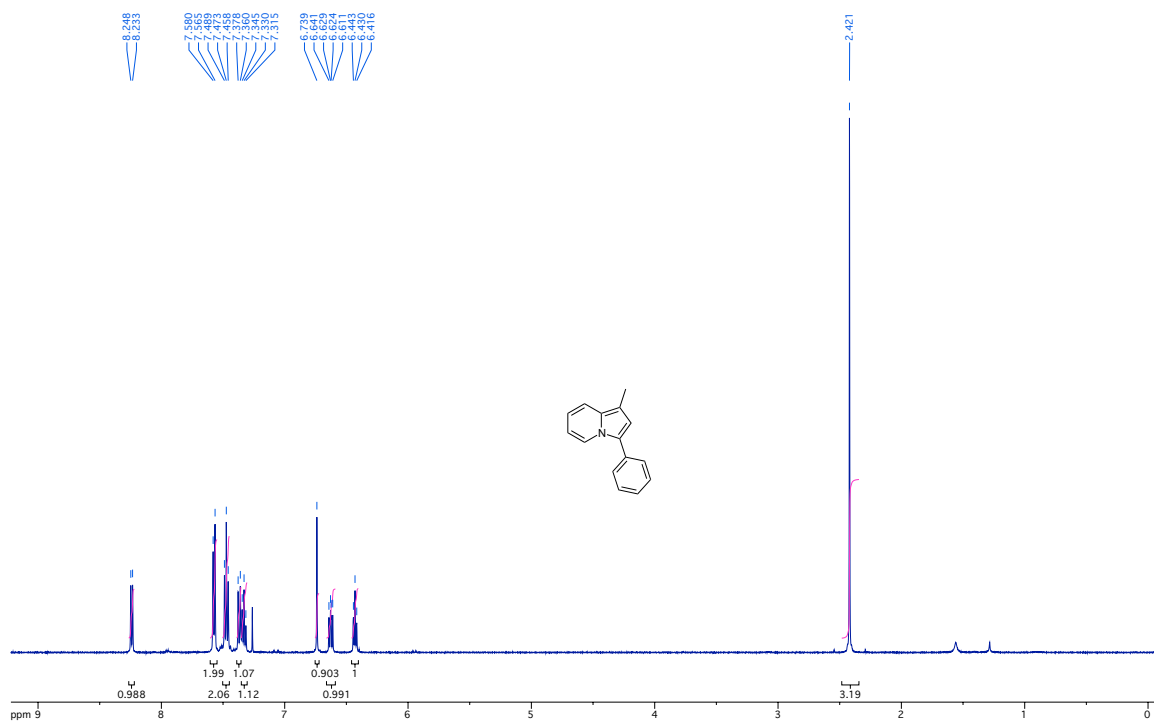

<sup>13</sup>C NMR spectrum of (3w)

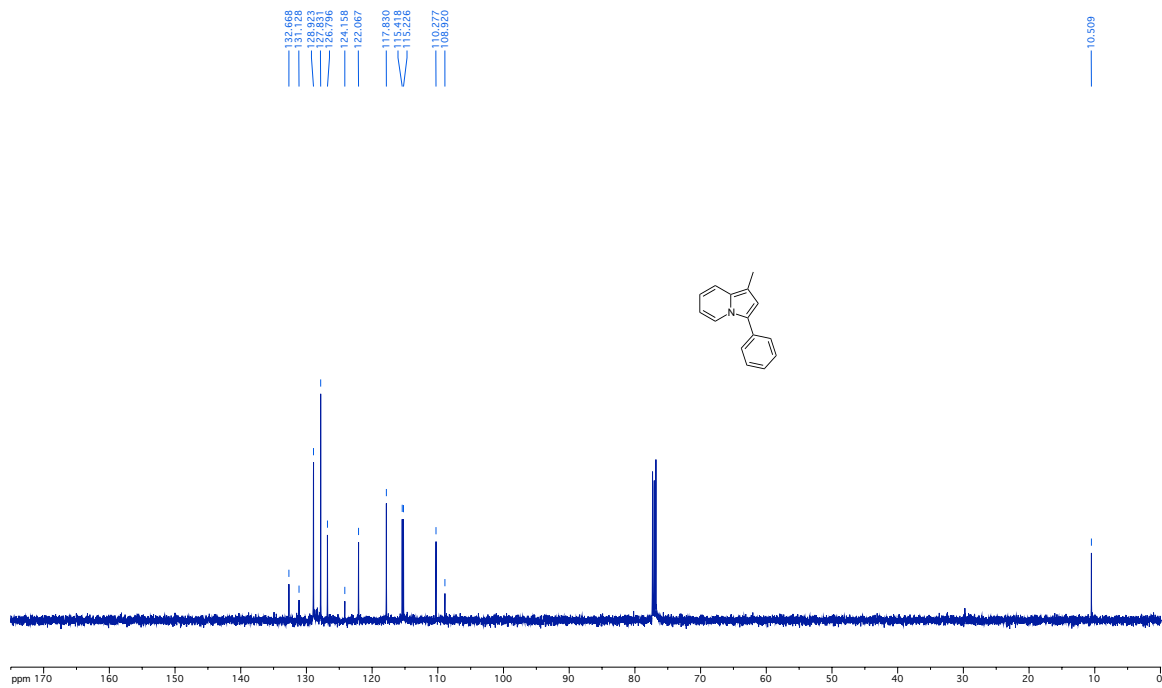

<sup>1</sup>H NMR spectrum of (3x)

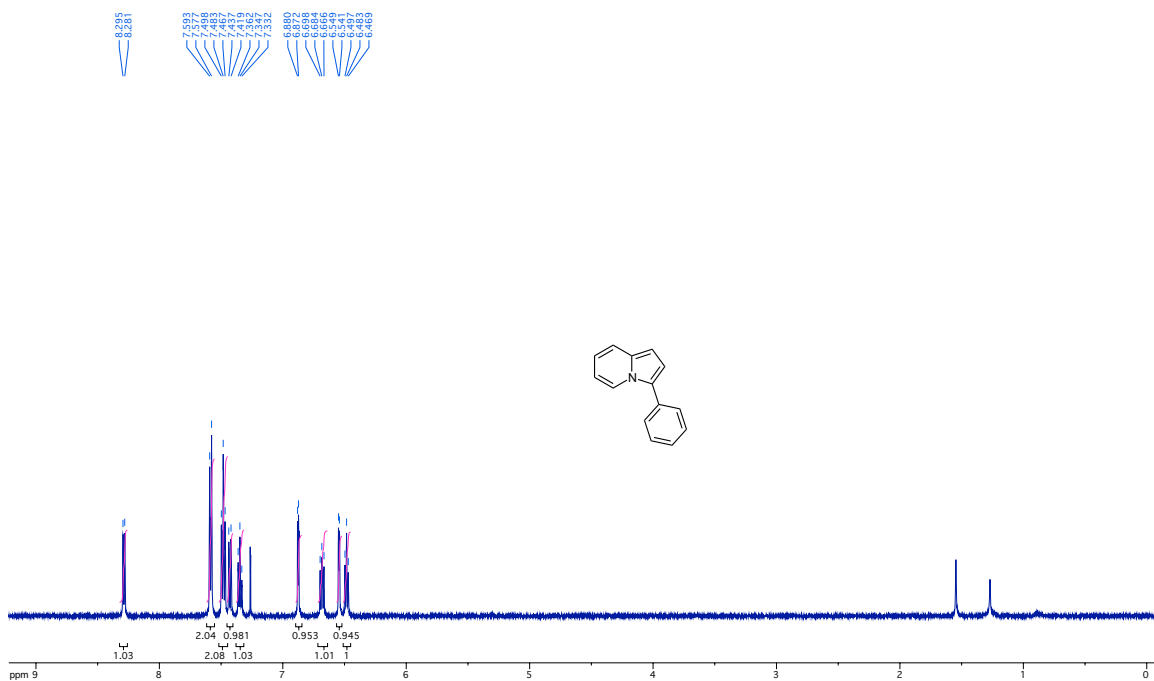

<sup>13</sup>C NMR spectrum of (3x)

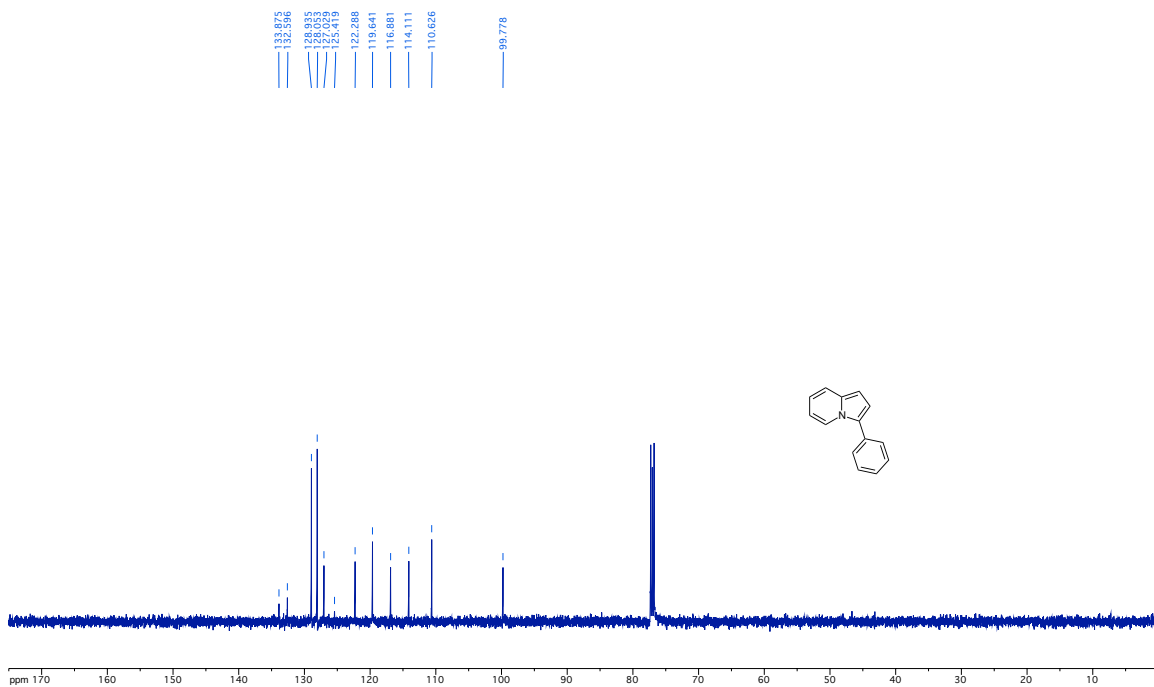

## 6. Copies of $^1\text{H}$ NMR Spectra for Deuterium-Labeling Studies

The spectra presented were zoomed in to the area containing the proton of interest.

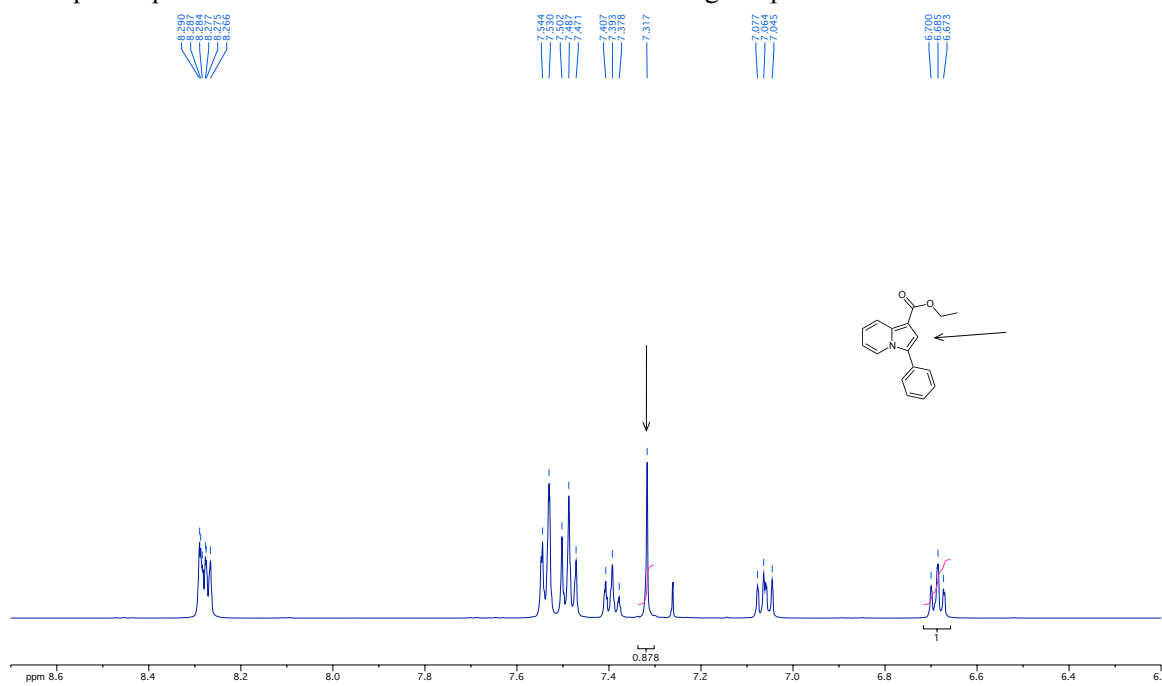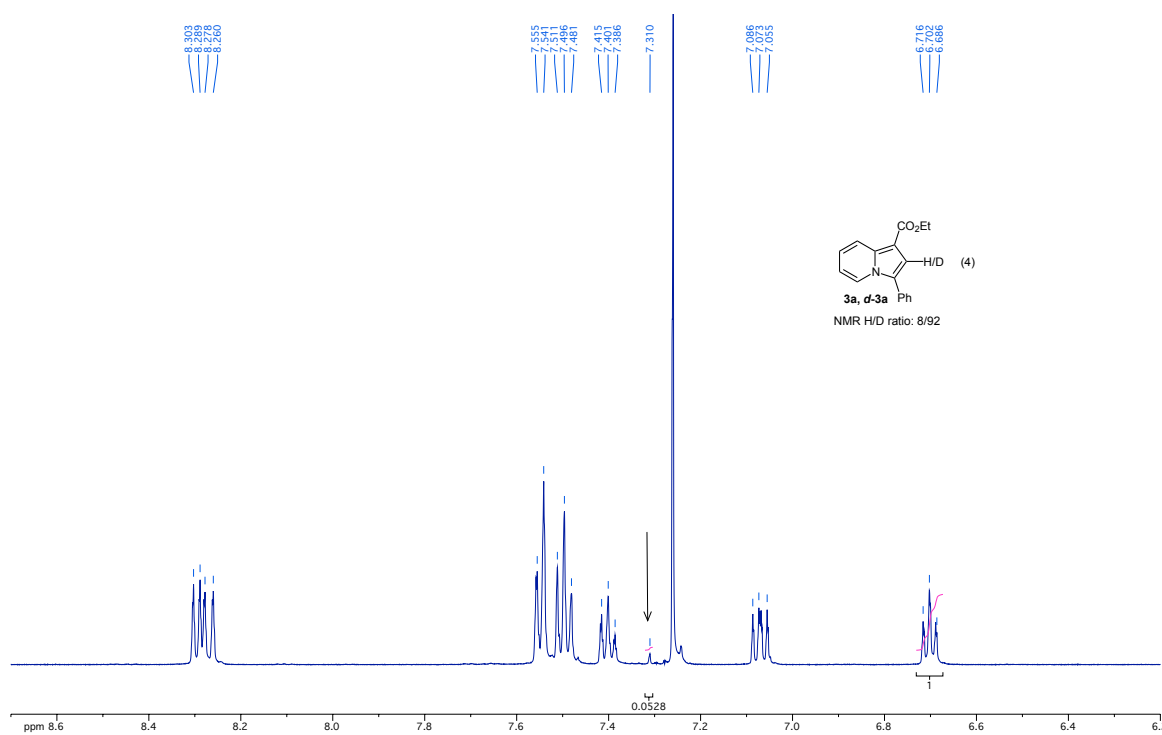

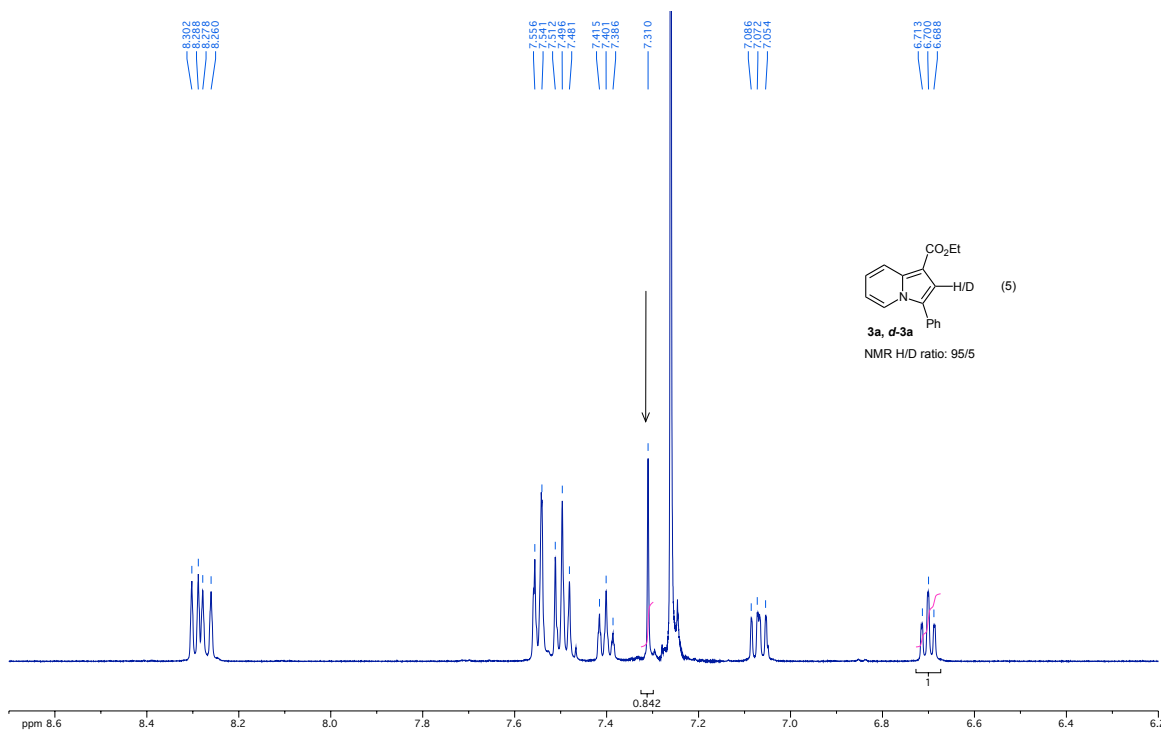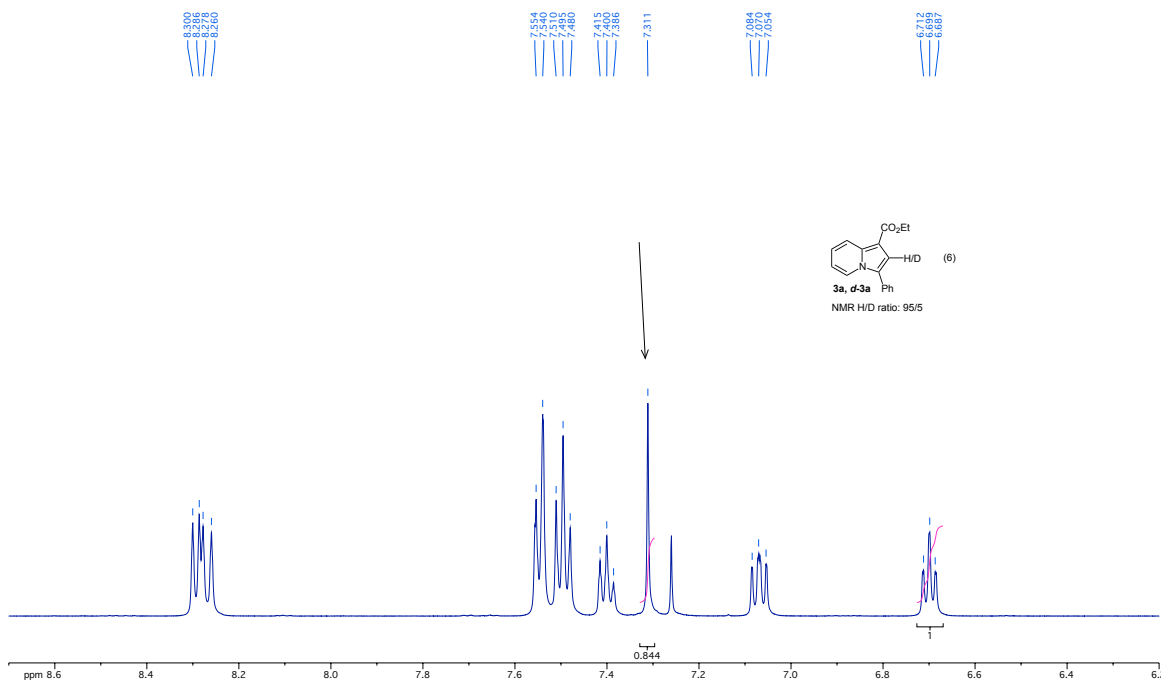

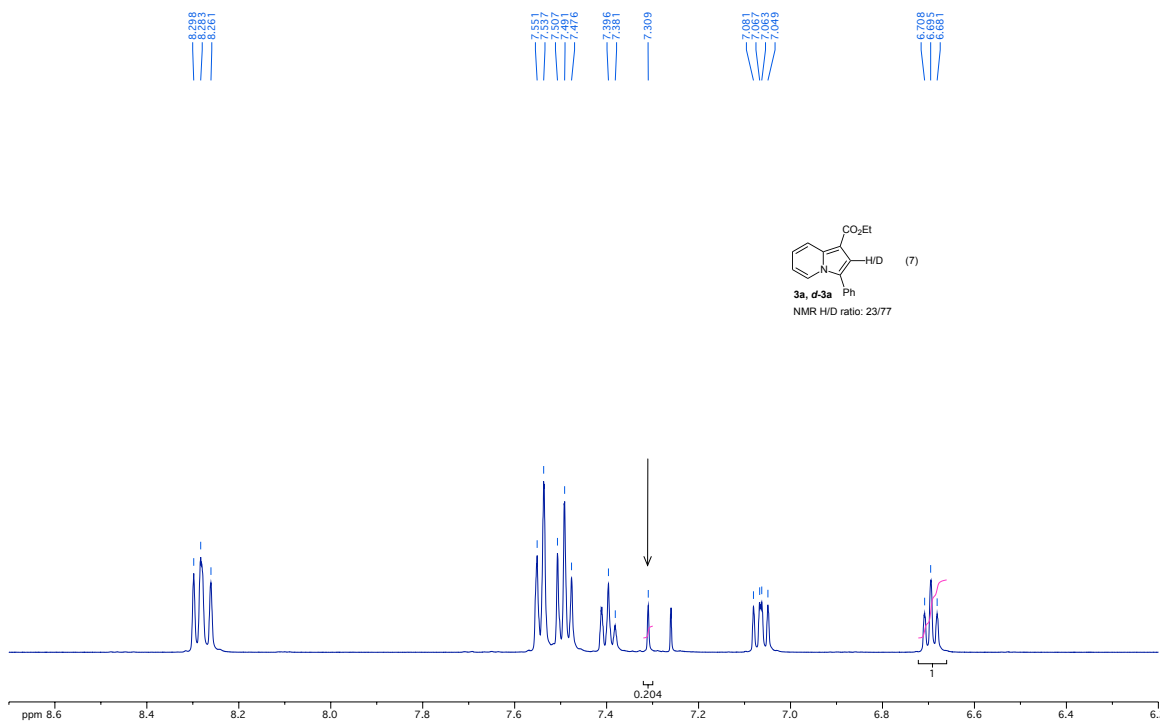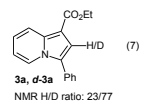

Supplement: SC-006-C4SC03358B-s001.pdf [file SC-006-C4SC03358B-s001.pdf]
